# Supplementary material for: Shikimate Kinase Plays Important Roles in Anthocyanin Synthesis in Petunia
Source: Int J Mol Sci. 2022 Dec 15;23(24):15964. doi: 10.3390/ijms232415964 (PMC9786173; doi:10.3390/ijms232415964)
Supplement: Supplementary file 1 [file ijms-23-15964-s001.zip]

Archive with 11 entries (11 files):
- Supplemental Data File 1.xlsx
- Supplemental Data File 10.xlsx
- Supplemental Data File 2.xlsx
- Supplemental Data File 3.xlsx
- Supplemental Data File 4.xlsx
- Supplemental Data File 5.xlsx
- Supplemental Data File 6.xlsx
- Supplemental Data File 7.xlsx
- Supplemental Data File 8.xlsx
- Supplemental Data File 9.xlsx
- Supplemental.pdf
