# Supplementary material for: Shikimate Kinase Plays Important Roles in Anthocyanin Synthesis in Petunia
Source: Int J Mol Sci. 2022 Dec 15;23(24):15964. doi: 10.3390/ijms232415964 (PMC9786173; doi:10.3390/ijms232415964)
Supplement: Supplementary file 1 [file ijms-23-15964-s001.zip › Supplemental Data File 1.xlsx]

## Sheet: Sheet1
Supporting Information Data 1 Total flavonoids metabolites identified in petunia corollas
Index	Formula	Compounds	Class I	Class II	CAS	Level	pTRV2-GFP3-1	pTRV2-GFP3-2	pTRV2-GFP3-3	pTRV2-PhSK-1	pTRV2-PhSK-2	pTRV2-PhSK-3	VIP	Fold_Change	Log2FC	Type
pmb0550	C21H21O11+	Cyanidin-3-O-glucoside (Kuromanin)	Flavonoids	Anthocyanidins	47705-70-4	1	16922000	22835000	16670000	9088000	8051300	9854900	1.08703	0.478392	-1.06374	down
Lmhp002242	C33H41O20+	Cyanidin-3-O-(2''-O-glucosyl)rutinoside	Flavonoids	Anthocyanidins	-	3	8233	6965.9	8894.3	3482.9	3133.6	4477.1	1.08516	0.460445	-1.1189	down
Zmcp002986	C33H41O21+	Cyanidin-3-O-sophoroside-5-O-glucoside	Flavonoids	Anthocyanidins	47888-56-2	1	8953100	9611200	9235700	4926800	3994500	4441600	1.12491	0.48068	-1.05685	down
Zmqp002952	C33H41O21+	Delphinidin-3-O-rutinoside-7-O-glucoside	Flavonoids	Anthocyanidins	-	1	721710	710900	724920	346220	351760	368890	1.14075	0.494487	-1.016	down
Zmcp002723	C36H43O24+	Cyanidin-3-O-(6''-O-malonyl)sophoroside-5-O-glucoside	Flavonoids	Anthocyanidins	63003-09-8	1	929080	725180	765150	328220	311510	508850	1.04065	0.474736	-1.0748	down
Lmqp002290	C42H47O24+	Cyanidin-3,3'-di-O-glucoside-7-O-(6''-O-caffeoyl)glucoside	Flavonoids	Anthocyanidins	-	1	25183000	25791000	26515000	12069000	12185000	12688000	1.14069	0.476739	-1.06873	down
pme3392	C21H21O10+	Pelargonidin-3-O-glucoside	Flavonoids	Anthocyanidins	47684-27-5	3	17930	24083	19955	30687	30329	19855	0.691164	1.30504	0.384099	insig
pme1398	C21H21O12+	Delphinidin-3-O-glucoside (Mirtillin)	Flavonoids	Anthocyanidins	50986-17-9	1	635630	861890	510950	473380	722610	780310	0.0456721	0.983983	-0.0232949	insig
pmb0545	C23H25O11+	Rosinidin-3-O-glucoside	Flavonoids	Anthocyanidins	-	3	52714	46640	52624	81004	97156	74567	1.0779	1.66292	0.733717	insig
pme3391	C22H23O12+	Petunidin-3-O-glucoside	Flavonoids	Anthocyanidins	6988-81-4	1	527990	402990	400500	394710	316650	387110	0.721075	0.824999	-0.277535	insig
pmb0542	C24H23O14+	Cyanidin-3-O-(6''-O-malonyl)glucoside	Flavonoids	Anthocyanidins	171828-62-9	2	13906	16531	14817	7358.7	15692	10515	0.699003	0.741718	-0.431058	insig
Lmjp001877	C26H29O15+	Cyanidin-3-O-sambubioside [Cyanidin-3-O-(2''-O-xylosyl)glucoside]	Flavonoids	Anthocyanidins	63535-17-1	3	27933	24627	20499	14244	9662.1	14364	1.02654	0.523825	-0.932844	insig
Lmpp003789	C30H27O13+	Cyanidin-3-O-(6''-O-p-Coumaroyl)glucoside	Flavonoids	Anthocyanidins	-	3	1014900	935590	992050	508340	539020	447260	1.12511	0.507935	-0.977283	insig
Lmcp004436	C30H27O14+	Cyanidin-3-O-(6''-O-caffeoyl)glucoside	Flavonoids	Anthocyanidins	-	3	8600500	8473600	8318800	4275700	4617600	4480400	1.13959	0.526671	-0.925027	insig
Lmpp003662	C30H27O14+	Delphinidin-3-O-(6''-O-p-coumaroyl)glucoside	Flavonoids	Anthocyanidins	-	3	478120	530900	448070	383510	481290	383750	0.755185	0.856879	-0.222836	insig
pme1777	C27H31O16+	Cyanidin-3,5-O-diglucoside (Cyanin)	Flavonoids	Anthocyanidins	2611-67-8	1	34364000	34585000	33885000	22847000	21778000	22638000	1.13904	0.654093	-0.612432	insig
Lmpp003815	C31H29O14+	Petunidin-3-O-(6''-O-p-Coumaroyl)glucoside	Flavonoids	Anthocyanidins	-	3	117060	108460	159370	73784	83867	52228	0.979135	0.545296	-0.874888	insig
pmf0614	C28H33O16+	Peonidin-3,5-O-diglucoside	Flavonoids	Anthocyanidins	47851-83-2	3	42213	43750	48031	53296	50812	44770	0.717329	1.11108	0.151962	insig
Lmcp005542	C30H27O15+	Delphinidin-3-O-(6''-O-caffeoyl)glucoside	Flavonoids	Anthocyanidins	-	1	264880	389630	334840	218720	119070	211550	0.915718	0.555253	-0.848782	insig
pmf0116	C27H31O17+	Delphinidin-3,5-di-O-glucoside	Flavonoids	Anthocyanidins	17670-06-3	1	34404000	34143000	37802000	32567000	29499000	26410000	0.917891	0.83194	-0.265448	insig
pmb0541	C30H33O19+	Cyanidin-3-O-(6''-O-malonyl)glucoside-5-O-glucoside	Flavonoids	Anthocyanidins	-	1	9821500	8906300	11337000	5176400	6010300	6059400	1.09067	0.573631	-0.801805	insig
Lmqp001812	C30H33O20+	Delphinidin-3-O-(6''-O-malonyl)glucoside-5-O-glucoside	Flavonoids	Anthocyanidins	-	1	5318700	4893500	5747100	6335800	6047800	5875400	0.913937	1.1441	0.19421	insig
Zmmp002007	C36H37O18+	Cyanidin-3-O-(6''-O-p-coumaroyl)glucoside-5-O-glucoside	Flavonoids	Anthocyanidins	-	3	8686	8787	6941.9	6664.1	4004.4	3692.5	0.927827	0.588206	-0.765606	insig
Zmmp003591	C33H41O20+	Delphinidin-3-O-(2'''-O-p-coumaroyl)rutinoside	Flavonoids	Anthocyanidins	-	2	1010400	1032600	802470	621210	587600	576200	1.07353	0.627316	-0.672735	insig
Zmmp003478	C37H39O18+	Petunidin-3-O-(6''-O-p-coumaroyl)glucoside-5-O-rhamnoside	Flavonoids	Anthocyanidins	-	1	234540	291260	246370	322130	126350	273020	0.256131	0.93438	-0.0979191	insig
Lmtp001633	C34H43O20+	Peonidin-3-O-rutinoside-5-O-glucoside	Flavonoids	Anthocyanidins	-	1	98053	99396	98877	58650	59972	71571	1.09984	0.641837	-0.639721	insig
Lmqp003814	C38H41O18+	Malvidin-3-O-(2'''-O-p-coumaroyl)rutinoside	Flavonoids	Anthocyanidins	-	1	10080000	11404000	10806000	10395000	10110000	8842600	0.707165	0.908876	-0.137845	insig
pmf0617	C34H43O21+	Peonidin-3-O-sophoroside-5-O-glucoside	Flavonoids	Anthocyanidins	79549-69-2	3	23802	22375	22350	14060	20316	19116	0.855864	0.780597	-0.357349	insig
Zmmp001564	C34H43O21+	Petunidin-3-O-rutinoside-5-O-glucoside	Flavonoids	Anthocyanidins	-	1	730150	752290	717950	844560	816390	801490	1.07377	1.11909	0.162329	insig
Lmqp003247	C36H37O20+	Delphinidin-3-O-(6''-O-caffeoyl)glucoside-5-O-glucoside	Flavonoids	Anthocyanidins	-	1	33105000	34948000	34387000	24297000	25025000	20376000	1.08195	0.680379	-0.55559	insig
Zmcp002839	C33H41O22+	Delphinidin-3,5,3'-Tri-O-glucoside	Flavonoids	Anthocyanidins	-	1	6888900	6941600	6376600	4962100	5273800	4919300	1.11104	0.749994	-0.415049	insig
Lmqp001553	C33H41O22+	Delphinidin-3-O-sophoroside-5-O-glucoside	Flavonoids	Anthocyanidins	-	1	58529000	58982000	57071000	54586000	53946000	52171000	1.05853	0.920502	-0.119508	insig
Zmpp002858	C38H41O19+	Malvidin-3-O-(6''-O-p-coumaroyl)glucoside-5-O-glucoside	Flavonoids	Anthocyanidins	-	2	113710	158070	58665	113360	82501	51950	0.376722	0.749931	-0.41517	insig
Zmmp002345	C35H45O21+	Malvidin-3-O-rutinoside-7-O-glucoside	Flavonoids	Anthocyanidins	-	1	2144000	2196700	2061600	2297300	2040500	2041200	0.0602072	0.996361	-0.00526	insig
Lmqp001828	C36H43O25+	Delphinidin-3-O-(2'''-O-malonyl)sophoroside-5-O-glucoside	Flavonoids	Anthocyanidins	-	1	24475000	26097000	26202000	26654000	21994000	22414000	0.59868	0.9256	-0.11154	insig
Zmmp003451	C42H47O22+	Cyanidin-3-O-(6''-O-p-coumaroyl)rutinoside-5-O-glucoside	Flavonoids	Anthocyanidins	-	2	11464	18374	21142	7510	21866	12954	0.374651	0.830326	-0.268251	insig
Zmmp003631	C43H49O22+	Peonidin-3-O-(6''-O-p-coumaroyl)rutinoside-5-O-glucoside	Flavonoids	Anthocyanidins	-	1	61324	82542	68758	50931	47569	30977	0.937675	0.608948	-0.715609	insig
Zmmp003244	C42H47O23+	Delphinidin-3-O-(2'''-O-p-coumaroyl)rutinoside-5-O-glucoside	Flavonoids	Anthocyanidins	-	1	289580	318260	320600	370890	259650	254990	0.26709	0.953783	-0.0682675	insig
Zmmp004046	C43H49O23+	Petunidin-3-O-(6''-O-p-coumaroyl)rutinoside-5-O-glucoside	Flavonoids	Anthocyanidins	-	1	7741800	7969200	7081700	6769500	6627100	6488900	0.998856	0.87245	-0.196855	insig
Cwjp001293	C42H47O24+	Cyanidin-3-O-(6''-O-caffeoyl)sophoroside-7-O-glucoside	Flavonoids	Anthocyanidins	-	1	1197300	1147600	1248500	648700	569800	640770	1.12998	0.517412	-0.950613	insig
Zmhp004122	C44H51O23+	Malvidin-3-O-(2'''-O-p-coumaroyl)rutinoside-5-O-glucoside	Flavonoids	Anthocyanidins	-	1	5540400	3242000	4606800	2563200	2850200	2469700	0.961041	0.588766	-0.764235	insig
Zmmp003155	C43H49O24+	Petunidin-3-O-(6''-O-caffeoyl)rutinoside-5-O-glucoside	Flavonoids	Anthocyanidins	-	1	1963400	2927800	1893600	1811800	1454600	1594200	0.82087	0.716395	-0.481172	insig
Lmqp002432	C49H59O28+	Petunidin-3-O-(6''-O-p-coumaroyl)rutinoside-5-O-glucoside-4'-O-glucoside	Flavonoids	Anthocyanidins	-	1	1465900	1323300	1300000	834480	1025400	839140	1.07277	0.660036	-0.599383	insig
Zmmp003556	C44H51O24+	Petunidin-3-O-(6''-O-feruloyl)rutinoside-5-O-glucoside	Flavonoids	Anthocyanidins	-	3	62072	45941	47534	114220	105480	94173	1.09147	2.01787	1.01283	up
pme2960	C15H12O5	Naringenin chalcone	Flavonoids	Chalcones	73692-50-9	1	1339100	1448000	1348700	367030	363200	361780	1.14174	0.264038	-1.92118	down
pme1201	C15H14O5	Phloretin	Flavonoids	Chalcones	60-82-2	3	24189	25161	24040	15338	15591	14721	1.13772	0.622019	-0.684969	insig
Lmlp006175	C21H22O10	Isosalipurposide (Phlorizin Chalcone)	Flavonoids	Chalcones	4547-85-7	2	1502200	1632400	1522000	880090	888100	808420	1.13266	0.553324	-0.853803	insig
HJN055	C21H24O10	Dihydrocharcone-4'-O-glucoside	Flavonoids	Chalcones	-	1	678580	675130	692200	548510	568930	591750	1.10703	0.835418	-0.25943	insig
Lmfn004093	C21H24O10	Phloretin-4'-O-glucoside (Trilobatin)	Flavonoids	Chalcones	4192-90-9	1	2368700	2388600	2724600	1735300	1437000	1725800	1.07332	0.65466	-0.611182	insig
mws2118	C21H24O10	Phloretin-2'-O-glucoside (Phlorizin)	Flavonoids	Chalcones	60-81-1	1	374210	394150	375410	346860	288230	323920	0.962985	0.838464	-0.254179	insig
Lmgn002933	C18H18O7	5,7-Dihydroxy-2',3',4'-trimethoxydihydroisoflavone	Flavonoids	Dihydroisoflavones	-	2	9960200	10153000	10143000	1974800	2060700	2030800	1.14244	0.200498	-2.31834	down
Lmdp003110	C15H12O6	2,6,7,4'-Tetrahydroxyisoflavanone	Flavonoids	Dihydroisoflavones	-	2	44276	32307	35918	26366	27629	30520	0.921614	0.751238	-0.412659	insig
mws0042	C15H14O7	Epigallocatechin	Flavonoids	Flavanols	970-74-1	3	110110	113890	123330	12218	11148	10179	1.14077	0.0965796	-3.37214	down
pmc1990	C17H16O5	4'-Hydroxy-5,7-dimethoxyflavanone	Flavonoids	Flavanols	-	3	14834000	14309000	14536000	15935000	15790000	16936000	1.04148	1.11406	0.155826	insig
mws0049	C15H14O7	Gallocatechin	Flavonoids	Flavanols	970-73-0	3	8128	5786	3583.2	2760.5	1391	3193.7	0.890207	0.419793	-1.25225	insig
pma0791	C24H24O13	Naringenin-7-O-(6''-malonyl)glucoside	Flavonoids	Flavanols	-	3	37052	43819	41234	35710	32108	30348	0.967255	0.803947	-0.314827	insig
Lmmp000897	C30H26O14	Gallocatechin-(4α→8)-gallocatechin	Flavonoids	Flavanols	-	2	6376300	6771000	5473800	4047800	3809400	3700900	1.09728	0.620699	-0.688034	insig
pme3475	C15H12O5	Butin	Flavonoids	Flavanones	492-14-8	1	403670	502980	471970	183350	198610	183040	1.12883	0.40983	-1.2869	down
MWSHY0137	C15H12O5	Naringenin (5,7,4'-Trihydroxyflavanone)	Flavonoids	Flavanones	480-41-1	1	454480	426080	418060	170680	212960	181610	1.12727	0.43527	-1.20002	down
mws1179	C21H22O10	Naringenin-7-O-glucoside (Prunin)	Flavonoids	Flavanones	529-55-5	1	1868300	1870100	1861700	789970	720300	682200	1.1375	0.391506	-1.3529	down
Lmzp002365	C22H24O11	Hesperetin-7-O-glucoside	Flavonoids	Flavanones	31712-49-9	3	13286000	14374000	12729000	6194900	6256000	5462400	1.13186	0.443519	-1.17293	down
pmb0686	C24H24O14	Eriodictyol-7-O-(6''-malonyl)glucoside	Flavonoids	Flavanones	-	3	31613	34925	36757	18791	16043	16419	1.12209	0.496181	-1.01106	down
Hmmn002379	C39H52O25	Eriodictyol-7-O-rutinoside-4'-O-Sophoroside	Flavonoids	Flavanones	-	3	220310	225910	230390	86863	78476	81092	1.13987	0.364214	-1.45714	down
mws0064	C15H12O6	Eriodictyol (5,7,3',4'-Tetrahydroxyflavanone)	Flavonoids	Flavanones	552-58-9	3	134720	130220	122850	110000	98071	104040	1.06193	0.804845	-0.313216	insig
Lmjn005592	C18H16O7	Cirsilineol (4',5-Dihydroxy-3',6,7-trimethoxyflavone)	Flavonoids	Flavanones	41365-32-6	2	1540300	1578300	1511700	1931800	1822500	1975600	1.10777	1.23748	0.307404	insig
HJN090	C21H22O10	Butin-7-O-glucoside	Flavonoids	Flavanones	-	1	2459300	2620700	2346600	1606200	1695700	1649900	1.12581	0.666765	-0.584749	insig
HJN087	C21H22O10	Naringenin-4'-O-glucoside	Flavonoids	Flavanones	-	1	2595000	2661400	2459600	1519400	1539100	1708500	1.12433	0.617807	-0.694772	insig
Jmgn004021	C21H22O11	6-C-Glucosyl-2-Hydroxynaringenin	Flavonoids	Flavanones	-	2	451340	495380	456470	344210	351690	368570	1.10687	0.758607	-0.398575	insig
HJN086	C21H22O11	Eriodictyol-3'-O-glucoside	Flavonoids	Flavanones	-	1	2898500	2603500	2795900	3023100	3395100	3252700	0.976157	1.16546	0.220904	insig
pmp000579	C22H22O11	Diosmetin-7-O-galactoside	Flavonoids	Flavanones	-	2	58922	62890	70471	124330	23749	26504	0.395845	0.907948	-0.139318	insig
pme1598	C22H24O11	Hesperetin-5-O-glucoside	Flavonoids	Flavanones	69651-80-5	3	41621000	44529000	43107000	23664000	24621000	24416000	1.13924	0.562453	-0.830195	insig
mws1454	C23H26O11	Persicoside	Flavonoids	Flavanones	28978-03-2	3	302790	293560	314500	477220	404760	437950	1.10179	1.44912	0.535176	insig
HJAP135	C24H24O12	Pinocembrin-7-O-(6''-O-malonyl)glucoside	Flavonoids	Flavanones	-	1	5913.2	4137.2	6962.3	10082	10996	12923	1.03062	1.99857	0.998965	insig
mws0046	C27H32O14	Naringenin-7-O-Neohesperidoside(Naringin)	Flavonoids	Flavanones	10236-47-2	3	18635	16632	6359.5	859020	14439	26497	0.624603	21.6198	4.43428	insig
mws0036	C28H34O15	Hesperetin-7-O-rutinoside (Hesperidin)	Flavonoids	Flavanones	520-26-3	3	6106.1	4109.7	10391	703820	11056	15831	0.693538	35.4595	5.1481	insig
pmb2970	C28H34O16	Hesperetin-5,7-di-O-glucoside	Flavonoids	Flavanones	-	3	2826.6	4046.8	4043.9	3156	3597.4	3280.6	0.318291	0.919092	-0.121719	insig
Hmmn002781	C39H50O26	Eriodictyol-7-O-rutinoside-5-O-(6''-O-glucosyl)glucuronide	Flavonoids	Flavanones	-	3	84397	88132	111230	89994	107840	95933	0.216529	1.03527	0.0500062	insig
mws0789	C15H12O4	Pinocembrin (Dihydrochrysin)	Flavonoids	Flavanones	480-39-7	1	804.11	1574.1	957.96	2447.7	2953.8	2323.8	1.02532	2.31562	1.2114	up
mws0058	C16H12O6	Diosmetin (5,7,3'-Trihydroxy-4'-methoxyflavone)	Flavonoids	Flavanones	520-34-3	1	63027	60368	59704	253710	204230	218990	1.13723	3.69707	1.88638	up
mws0914	C15H12O5	Pinobanksin	Flavonoids	Flavanonols	548-82-3	1	1257900	1227800	1235300	321310	320850	356190	1.14087	0.268302	-1.89807	down
Lmtn002796	C21H22O11	Aromadendrin-7-O-glucoside	Flavonoids	Flavanonols	28189-90-4	1	187270	225110	198700	82647	65839	64262	1.12344	0.348151	-1.52222	down
mws1094	C15H12O6	Aromadendrin (Dihydrokaempferol)	Flavonoids	Flavanonols	480-20-6	1	208400	199490	190950	107190	110760	108580	1.13814	0.545271	-0.874955	insig
mws0044	C15H12O7	Dihydroquercetin(Taxifolin)	Flavonoids	Flavanonols	480-18-2	1	6930100	6984200	7251700	4857500	5399500	4878400	1.11631	0.715081	-0.483822	insig
mws0744	C15H12O8	Dihydromyricetin (Ampelopsin)	Flavonoids	Flavanonols	27200-12-0	3	9491	10248	8007.4	5683.6	5190.2	1856.3	0.879978	0.458802	-1.12406	insig
mws1361	C21H22O11	Taxifolin-3-O-rhamnoside (Astilbin)	Flavonoids	Flavanonols	29838-67-3	2	120170	116630	109170	94002	105070	94208	0.998554	0.847704	-0.238368	insig
Lmmn004625	C21H22O11	Dihydrokaempferol-7-O-glucoside	Flavonoids	Flavanonols	-	1	2846400	2712900	2701900	3230100	3148400	2998300	1.04858	1.13504	0.182744	insig
Xmsn002700	C21H22O12	Taxifolin-3'-O-glucoside	Flavonoids	Flavanonols	31106-05-5	3	1431100	1346400	1305900	959980	811460	866640	1.106	0.64605	-0.630283	insig
HJN104	C21H22O13	Dihydromyricetin-3-O-glucoside	Flavonoids	Flavanonols	-	2	568190	567990	568990	2871300	2977000	3074100	1.14213	5.23256	2.38752	up
Hmcn002875	C15H10O7	6-Hydroxyluteolin	Flavonoids	Flavones	18003-33-3	3	16385	16899	16292	5044.3	4694.7	4429.1	1.14013	0.285785	-1.807	down
mws0920	C15H10O7	Tricetin (5,7,3',4',5'-Pentahydroxyflavone)	Flavonoids	Flavones	520-31-0	2	24274	22595	20174	9648.6	10828	10358	1.1279	0.459923	-1.12054	down
Zmhp002734	C17H14O8	5,7,2',5'-Tetrahydroxy-8,6'-dimethoxyflavone	Flavonoids	Flavones	-	2	94913	91254	84479	28355	29780	34024	1.13464	0.340515	-1.55421	down
pmp000009	C18H16O8	Centaureidin (5,7,3'-Trihydroxy-3,6,4'-Trimethoxyflavone)	Flavonoids	Flavones	17313-52-9	1	36532	42396	39640	19129	17909	19328	1.13256	0.47539	-1.07282	down
Lmxn007456	C18H16O8	Acerosin	Flavonoids	Flavones	15835-74-2	1	1812400	1765400	1744900	866240	888620	865230	1.14168	0.492248	-1.02254	down
Lmbp003668	C20H18O10	Kaempferol-3-O-arabinoside	Flavonoids	Flavones	-	3	7572.3	7776.1	8787.5	9	9	9	1.14242	0.00111867	-9.80401	down
MWSHY0040	C21H20O10	Oroxin A	Flavonoids	Flavones	57396-78-8	3	3666.1	4352.6	4192.8	9	9	9	1.14238	0.00221103	-8.82107	down
MWS20148	C21H20O10	Apigenin-3'-O-α-D-glucopyranoside	Flavonoids	Flavones	-	3	18805	27234	21785	6898.5	6657.6	8682.4	1.10997	0.327885	-1.60874	down
MWSHY0104	C21H20O11	Luteolin-7-O-glucoside (Cynaroside)	Flavonoids	Flavones	5373-11-5	1	1755500	2604100	3043700	1124300	858000	1152300	1.04182	0.423406	-1.23989	down
Hmpp003270	C21H20O11	Luteolin-4'-O-glucoside*	Flavonoids	Flavones	6920-38-3	1	897370	730080	742490	447790	377360	351150	1.09949	0.496342	-1.01059	down
pmb3012	C22H22O11	Chrysoeriol-7-O-glucoside	Flavonoids	Flavones	19993-32-9	3	152580	138710	131830	72015	59762	62183	1.12327	0.458404	-1.12531	down
pmb3000	C24H24O12	Chrysoeriol-7-O-(6''-acetyl)glucoside	Flavonoids	Flavones	-	3	6944.8	10509	8352.2	9	9	9	1.14189	0.00104627	-9.90053	down
pmp000013	C24H26O12	Eupatilin-7-O-glucoside	Flavonoids	Flavones	-	1	53264	59496	61140	6000.9	4146	7454.3	1.1291	0.101214	-3.30451	down
pmp000593	C27H30O15	Luteolin-7-O-rutinoside	Flavonoids	Flavones	3563-98-2	2	279470	290120	269030	143480	128340	131850	1.13536	0.48135	-1.05484	down
MWSHY0080	C27H30O15	Luteolin-7-O-neohesperidoside (Lonicerin)	Flavonoids	Flavones	25694-72-8	1	1105800	1140600	1097600	492290	506110	615440	1.12176	0.482608	-1.05108	down
Hmjp002999	C28H32O16	Isorhamnetin-3-O-rutinoside (Narcissin)	Flavonoids	Flavones	604-80-8	3	119090	159280	151950	70196	79156	54614	1.06958	0.473987	-1.07708	down
HJAP120	C28H32O16	Rhamnetin-3-O-Rutinoside	Flavonoids	Flavones	-	3	153530	163300	140520	73202	75576	70550	1.13314	0.479563	-1.06021	down
Zmzp002265	C27H30O18	artemisidin A	Flavonoids	Flavones	-	1	247420	226650	239750	57386	96987	82343	1.10176	0.331619	-1.5924	down
Hmqp003184	C29H30O18	Luteolin-7-O-(6''-malonyl)glucoside-5-O-arabinoside	Flavonoids	Flavones	-	3	37829	36500	41649	20242	21463	14847	1.0845	0.48761	-1.0362	down
Hmlp003185	C30H32O18	Luteolin-7-O-(6''-malonyl)glucoside-5-O-rhamnoside	Flavonoids	Flavones	-	3	75860	72343	53206	26943	30178	25096	1.10107	0.408209	-1.29262	down
Hmmn003584	C33H40O19	Luteolin-7-O-rutinoside-5-O-rhamnoside	Flavonoids	Flavones	-	1	97775	89156	99969	23502	21759	23359	1.14023	0.239177	-2.06385	down
Hmmp002322	C40H52O24	Chrysoeriol-5,7-di-O-rutinoside	Flavonoids	Flavones	-	1	186170	209860	189170	79288	107290	99609	1.10368	0.489041	-1.03197	down
mws0040	C15H10O4	Chrysin	Flavonoids	Flavones	480-40-0	2	1791.3	1185.1	913.73	1057.9	2549.9	2278.7	0.560688	1.51319	0.597592	insig
Lmsp004632	C15H10O6	Scutellarein (5,6,7,4'-Tetrahydroxyflavone)	Flavonoids	Flavones	529-53-3	1	159700	155260	190800	114670	90956	78523	1.04567	0.561826	-0.831805	insig
Zmhp003514	C16H12O6	6,7,8-Tetrahydroxy-5-methoxyflavone	Flavonoids	Flavones	-	1	4825300	4970800	4887100	5345000	5161000	5270200	1.07199	1.07444	0.103583	insig
Zmpn004713	C15H10O7	Isoetin (5,7,2',4',5'-Pentahydroxyflavone)	Flavonoids	Flavones	1621-84-7	2	10522	12527	11792	8472.5	11384	9126.9	0.779778	0.831876	-0.265559	insig
Lmsp008392	C17H14O6	4',5-Dihydroxy-3',5'-dimethoxyflavone	Flavonoids	Flavones	-	1	9500.7	8297.9	10218	9518.6	9686.1	10438	0.461821	1.05804	0.081395	insig
pmp000003	C16H12O7	Nepetin (5,7,3',4'-Tetrahydroxy-6-methoxyflavone)	Flavonoids	Flavones	520-11-6	1	21460000	22788000	21704000	26141000	25766000	25634000	1.11124	1.17572	0.233543	insig
Lmzp004885	C17H14O7	Tricin (5,7,4'-Trihydroxy-3',5'-dimethoxyflavone)	Flavonoids	Flavones	520-32-1	1	518040	545470	520570	450510	424430	467910	1.0617	0.847716	-0.238347	insig
pmp000004	C17H14O7	4',5,7-Trihydroxy-3',6-dimethoxyflavone (Jaceosidin)	Flavonoids	Flavones	18085-97-7	1	17622000	17527000	17132000	16875000	16465000	16458000	1.02393	0.952507	-0.0701989	insig
Lmyp006951	C17H14O7	5,8,4'-Trihydroxy-6,7-dimethoxyflavone	Flavonoids	Flavones	98755-25-0	1	254210	264480	251740	264250	241970	244700	0.435092	0.974676	-0.0370047	insig
Lmtp004722	C16H12O8	Mearnsetin	Flavonoids	Flavones	16805-10-0	3	29026	28193	27676	21797	10090	12996	0.951494	0.528688	-0.91951	insig
Zmhp004065	C18H16O7	7,8-Dihydroxy-5,6,4'-trimethoxyflavone	Flavonoids	Flavones	-	1	811390	842100	815080	1009900	1011700	1138200	1.08268	1.28001	0.356158	insig
MWSHY0054	C18H16O7	Eupatorin; 3',5-Dihydroxy-4',6,7-Trimethoxyflavone	Flavonoids	Flavones	855-96-9	1	2051	2542.3	3103.5	4090.2	3332.1	3418.1	0.905889	1.40843	0.494087	insig
HJAP058	C19H20O6	5,6,7,4'-Tetramethoxyflavanone	Flavonoids	Flavones	2569-77-9	3	8178.5	9509.9	8499.6	10462	10976	10188	1.00897	1.20765	0.272205	insig
Zmjp004875	C17H14O8	5,6,3',4'-Tetrahydroxy-3,7-dimethoxyflavone	Flavonoids	Flavones	-	2	1644	7911.8	6583.8	23707	3277	9910.2	0.499717	2.28594	1.19279	insig
pmp000788	C18H16O8	Chrysosplenol D	Flavonoids	Flavones	14965-20-9	1	3895100	4135300	4061600	2024400	2036700	2049600	1.14103	0.505351	-0.984643	insig
Zmhp004269	C19H18O8	Skullcapflavone II	Flavonoids	Flavones	55084-08-7	1	99946	104910	101050	57212	61680	60917	1.13698	0.587792	-0.766623	insig
Zmjp009119	C19H18O8	5,4'-Dihydroxy-3,6,7,3'-tetramethoxyflavone	Flavonoids	Flavones	130252-52-7	1	52042	53905	52968	29275	32988	31324	1.13286	0.588912	-0.763875	insig
Hmmp007513	C19H18O8	5,7-Dihydroxy-6,3',4',5'-tetramethoxyflavone (Arteanoflavone)	Flavonoids	Flavones	68710-17-8	1	49173	53268	53314	32566	33200	33684	1.13366	0.638503	-0.647235	insig
Lmyp005841	C21H20O9	Chrysin-7-O-glucoside	Flavonoids	Flavones	31025-53-3	1	170200	170990	159310	126490	134610	129830	1.11284	0.781079	-0.35646	insig
Hmhp004295	C22H20O11	Wogonin-7-O-Glucuronide (Wogonoside)	Flavonoids	Flavones	51059-44-0	3	24215	23690	22264	21736	17200	20682	0.844994	0.849634	-0.235086	insig
Lmjp003655	C22H22O11	6-C-MethylKaempferol-3-glucoside	Flavonoids	Flavones	-	2	84721	45597	66270	126060	22420	18124	0.437228	0.847478	-0.238752	insig
pmb2999	C22H22O11	Chrysoeriol-5-O-glucoside	Flavonoids	Flavones	-	3	1059400	928160	940850	555610	484250	476080	1.12046	0.517667	-0.949905	insig
Hmgp002189	C22H22O11	Hispidulin-7-O-Glucoside	Flavonoids	Flavones	17680-84-1	1	69201	71148	50336	209620	25498	28429	0.128843	1.38211	0.466869	insig
Hmcn001884	C21H20O12	6-Hydroxyluteolin 5-glucoside	Flavonoids	Flavones	-	1	33072000	36633000	36636000	17921000	21077000	22295000	1.10503	0.576382	-0.794904	insig
pmp000581	C23H22O11	Apigenin-7-O-(6''-acetyl)glucoside	Flavonoids	Flavones	72741-92-5	3	151970	159020	155840	136640	140210	137920	1.1078	0.888482	-0.170586	insig
pmb3042	C23H24O12	Tricin-5-O-Glucoside	Flavonoids	Flavones	32769-00-9	2	530300	450370	638600	346970	249680	325680	1.01707	0.569596	-0.811989	insig
Lmtn002997	C22H22O13	Mearnsetin-3-O-glucoside	Flavonoids	Flavones	-	2	306330	350770	372170	283300	206470	233850	0.974577	0.703042	-0.508317	insig
pmb3041	C23H22O14	Tricin-7-O-saccharic acid	Flavonoids	Flavones	-	3	651250	683890	675800	350450	349090	372260	1.13887	0.532985	-0.907834	insig
Hmjn004446	C30H26O13	Luteolin-7-O-(6''-caffeoyl)rhamnoside	Flavonoids	Flavones	-	3	10019	5868.2	6127.9	35408	12430	40765	0.96782	4.02465	2.00886	insig
MWSHY0197	C27H30O15	Oroxin B	Flavonoids	Flavones	114482-86-9	3	54355	62062	49274	50802	78718	55813	0.353147	1.11855	0.161625	insig
Hmpp002612	C27H30O16	Luteolin-7-O-gentiobioside	Flavonoids	Flavones	-	1	11001000	10175000	10422000	6683000	6259900	5852800	1.12548	0.594838	-0.749431	insig
Lmmp006598	C31H26O14	Apigenin-7-O-(2''-feruloyl)glucuronide	Flavonoids	Flavones	-	3	2375.3	2835.5	4476.4	2256	1855.6	1328.2	0.862768	0.561545	-0.832526	insig
pmb0713	C29H34O17	Tricin-7-O-(2''-O-glucosyl)glucoside	Flavonoids	Flavones	-	1	517640	580760	282460	502530	624110	483670	0.429421	1.16616	0.221771	insig
MWSHY0122	C34H42O20	Typhaneoside	Flavonoids	Flavones	104472-68-6	3	4279000	4683600	4180500	2675900	2495500	2758700	1.12414	0.603366	-0.728895	insig
Cwjp002289	C42H46O23	Luteolin-7-O-(2''''-O-rhamnosyl)sophorotrioside	Flavonoids	Flavones	-	3	631450	660740	481790	458980	467580	449140	0.888186	0.775488	-0.366824	insig
Hmmp002324	C41H54O25	Tricin-4'-O-rutinoside-7-O-rutinoside	Flavonoids	Flavones	-	1	4730100	4431300	4365800	3299800	3149600	3201100	1.12637	0.713414	-0.487188	insig
Zmhn003257	C16H12O6	5,7,2'-Trhiyroxy-8-methoxyflavone	Flavonoids	Flavones	-	1	57510	59739	59199	248250	210800	212350	1.13906	3.80509	1.92793	up
mws0055	C20H20O7	Tangeretin (4',5,6,7,8-Pentamethoxyflavone)	Flavonoids	Flavones	481-53-8	2	120380	139150	119850	1833200	942370	1904700	1.12327	12.3366	3.62488	up
mws0043	C21H22O8	Nobiletin (5,6,7,8,3',4'-Hexamethoxyflavone)	Flavonoids	Flavones	478-01-3	2	240730	260350	238110	1830200	742880	1566500	1.08374	5.60016	2.48547	up
pma0825	C24H22O12	Chrysin-7-O-(6''-malonyl)glucoside	Flavonoids	Flavones	-	3	4169.8	5408.5	5641.8	25424	22930	29387	1.13067	5.10779	2.3527	up
pmb0608	C25H24O14	Chrysoeriol-7-O-(6''-malonyl)glucoside	Flavonoids	Flavones	-	3	11883	11410	10710	35442	32961	29723	1.13564	2.8858	1.52897	up
Zmxp005470	C26H26O15	Tricin-7-O-(6''-O-malonyl)glucoside	Flavonoids	Flavones	-	1	349950	390900	377140	890120	843950	858880	1.13839	2.3193	1.21369	up
Lmpp003930	C30H26O12	Apigenin-7-O-(6''-p-Coumaryl)glucoside	Flavonoids	Flavones	-	2	9	9	9	945090	3929	6603.5	1.05046	35393.4	15.1112	up
pme0368	C27H30O14	Apigenin-7-O-rutinoside (Isorhoifolin)	Flavonoids	Flavones	552-57-8	2	9	9	9	887720	4593	6280	1.05468	33281.2	15.0224	up
mws0047	C27H30O14	Apigenin-7-O-neohesperidoside (Rhoifolin)	Flavonoids	Flavones	17306-46-6	2	9	9	9	1008600	4631.1	12802	1.06467	38001.2	15.2138	up
Lmyp004318	C30H26O13	Kaempferol-3-O-(6''-p-Coumaroyl)galactoside	Flavonoids	Flavones	-	3	9	9	9	183450	2999.2	6875.3	1.08428	7160.17	12.8058	up
pmb3014	C31H30O15	Luteolin-7-O-(6''-eudesmyl)glucoside	Flavonoids	Flavones	-	3	5951.5	6396.7	8401	44356	38499	42196	1.13394	6.02679	2.59139	up
pmb0660	C36H36O18	Isoorientin-7-O-(6''-p-coumaroyl)glucoside	Flavonoids	Flavonoid carbonoside	-	3	6151600	4486400	4253100	1711800	1523000	1537100	1.11642	0.320453	-1.64181	down
pme1611	C21H22O10	Isohemiphloin	Flavonoids	Flavonoid carbonoside	3682-02-8	3	28013	31067	22925	18722	16726	12636	1.00275	0.586354	-0.770155	insig
pmb0624	C27H30O16	Isoorientin-7-O-glucoside	Flavonoids	Flavonoid carbonoside	-	3	59822	52698	55206	53969	52703	50127	0.697164	0.934852	-0.09719	insig
pmb0618	C28H34O16	Hesperetin-8-C-glucoside-3'-O-glucoside	Flavonoids	Flavonoid carbonoside	-	3	117640	109830	118350	79203	105300	87608	0.936416	0.786857	-0.345826	insig
Lmnp002448	C28H32O17	5,7,3',4'-Tetrahydroxy-6-methoxyflavone-8-C-[glucosyl-(1-2)]-glucoside	Flavonoids	Flavonoid carbonoside	-	3	343240	327000	392440	344040	278880	237410	0.767725	0.809585	-0.304745	insig
pmb1108	C33H40O21	Luteolin-6,8-di-C-glucoside-7-O-glucoside	Flavonoids	Flavonoid carbonoside	-	3	10801	11997	14681	6538.4	6459.8	8748.4	1.02588	0.580234	-0.785293	insig
pmb0666	C38H40O19	Isovitexin-7-O-(6''-sinapoyl)glucoside	Flavonoids	Flavonoid carbonoside	-	2	53194	52762	66209	27998	35539	32122	1.08074	0.555624	-0.847819	insig
MWSHY0051	C15H10O6	Kaempferol (3,5,7,4'-Tetrahydroxyflavone)	Flavonoids	Flavonols	520-18-3	1	38633	45201	46491	4524.7	5375.1	6107.6	1.13726	0.122827	-3.0253	down
MWSHY0102	C15H10O7	Quercetin	Flavonoids	Flavonols	117-39-5	1	32781	34082	26451	7505.4	10151	10752	1.11468	0.304439	-1.71578	down
mws0988	C16H12O7	Rhamnetin	Flavonoids	Flavonols	90-19-7	2	17624	17869	17042	9	9	9	1.14252	0.000513943	-10.9261	down
mws0032	C15H10O8	Myricetin	Flavonoids	Flavonols	529-44-2	2	18887	21489	20750	3542.2	3694.3	5769	1.11954	0.212765	-2.23266	down
MWSHY0136	C21H20O11	Kaempferol-3-O-glucoside (Astragalin)	Flavonoids	Flavonols	480-10-4	1	4261900	5731600	5293400	1829300	1916900	1768100	1.12468	0.360721	-1.47105	down
mws0913	C21H20O11	Kaempferol-3-O-galactoside (Trifolin)	Flavonoids	Flavonols	23627-87-4	1	4458600	4959600	4613200	1573600	1544400	1347700	1.13674	0.318265	-1.6517	down
pmn001640	C20H18O12	Myricetin-3-O-arabinoside*	Flavonoids	Flavonols	132679-85-7	3	25004	26117	19480	4949.9	5469.8	6066.4	1.13022	0.233511	-2.09844	down
Lmzn001894	C21H18O12	Kaempferol-3-O-glucuronide	Flavonoids	Flavonols	22688-78-4	3	24097	21692	28099	13801	9875.8	12861	1.07439	0.494502	-1.01595	down
Lmmp001947	C21H20O13	Gossypetin-3-O-glucoside	Flavonoids	Flavonols	-	1	2125200	2036700	2429300	500190	466180	379730	1.13371	0.204227	-2.29176	down
Lmdp002969	C21H20O13	Myricetin-3-O-galactoside	Flavonoids	Flavonols	15648-86-9	1	2034800	2268200	1999900	482450	662450	372830	1.11275	0.240799	-2.0541	down
Lmfp003403	C21H20O13	Quercetagetin-7-O-glucoside	Flavonoids	Flavonols	548-75-4	1	1918700	2114200	2322000	449470	557280	460940	1.13497	0.230954	-2.11432	down
Lmpp003465	C21H20O13	Myricetin-3-O-glucoside	Flavonoids	Flavonols	19833-12-6	1	2188400	2198300	1829600	440740	520110	310640	1.11984	0.204541	-2.28954	down
HJAP148	C26H28O15	Kaempferol-3-O-sambubioside	Flavonoids	Flavonols	27661-51-4	2	165480	181250	183760	81449	85586	61728	1.10824	0.43123	-1.21347	down
pme1605	C27H30O15	Kaempferol-3-O-robinobioside(Biorobin)	Flavonoids	Flavonols	17297-56-2	2	995670	995870	953990	445350	394860	374330	1.13397	0.412333	-1.27812	down
MWSslk254	C27H30O15	Kaempferol-3-O-glucorhamnoside	Flavonoids	Flavonols	40437-72-7	1	1021100	1207200	1048500	518230	571310	462190	1.11768	0.47355	-1.07841	down
Lmsn002815	C27H30O15	Kaempferol-3-O-rutinoside(Nicotiflorin)	Flavonoids	Flavonols	17650-84-9	1	286410	289770	254270	124550	103380	119010	1.12762	0.417773	-1.25921	down
MWSHY0061	C27H30O15	Kaempferol-3-O-neohesperidoside	Flavonoids	Flavonols	32602-81-6	1	1005800	1082100	1082500	444740	536560	404150	1.11929	0.436995	-1.19431	down
Lmyp004052	C30H26O14	Quercetin-3-O-(6''-p-Coumaroyl)galactoside	Flavonoids	Flavonols	-	2	247500	225160	236040	50309	49427	36400	1.13276	0.192093	-2.38013	down
Lmdp004267	C30H26O14	Quercetin-3-O-(6''-p-Coumaroyl)glucoside	Flavonoids	Flavonols	-	2	259040	269140	265840	53793	55510	42783	1.13693	0.191539	-2.38429	down
Lmbp002592	C27H30O16	Kaempferol-3,7-di-O-glucoside	Flavonoids	Flavonols	-	1	8995900	8416600	7505300	4147400	4619700	3563100	1.10596	0.494835	-1.01498	down
Hmln001836	C29H32O17	Kaempferol-3-O-(6''-Acetyl)glucosyl-(1→3)-Galactoside	Flavonoids	Flavonols	-	3	293010	287510	298480	99231	108690	103220	1.14104	0.353972	-1.49829	down
Zmcn004806	C36H36O18	kaempferol-3-p-coumaroyldiglucoside	Flavonoids	Flavonols	-	1	179730	183880	171940	63862	57737	54189	1.1374	0.328238	-1.60718	down
Lmsp003161	C33H40O20	Kaempferol-3-O-sophoroside-7-O-rhamnoside	Flavonoids	Flavonols	-	2	47427	56254	62032	25025	18910	18401	1.10605	0.376168	-1.41055	down
Lmpp003268	C33H40O20	Kaempferol-3-O-rutinoside-7-O-glucoside	Flavonoids	Flavonols	-	2	112370	109950	96277	40862	60495	45516	1.08892	0.460999	-1.11716	down
Lmyp005280	C37H38O18	Isorhamnetin-3-O-[2'''-O-(6''-p-coumaryl)glucosyl]rhamnoside	Flavonoids	Flavonols	-	2	484510	475350	499150	111320	103600	109280	1.14169	0.222205	-2.17003	down
Lmdp004336	C36H36O19	Kaempferol-3-O-(6'''-Caffeoyl)glucosyl-(1→2)-Galactoside	Flavonoids	Flavonols	-	2	5826800	4358600	6909300	1847600	2468000	2153600	1.08557	0.378433	-1.40189	down
Zmcn004206	C36H36O19	kaempferol-3-caffeoyldiglucoside	Flavonoids	Flavonols	-	2	8380200	8258000	7933600	3121800	3143700	3156200	1.14185	0.383435	-1.38294	down
Lmwp003888	C33H40O21	Kaempferol-3-O-sophoroside-7-O-glucoside	Flavonoids	Flavonols	-	3	359450	312820	403410	153600	191270	170880	1.10514	0.479464	-1.06051	down
Lmdp004160	C36H36O20	Quercetin-3-O-(2'''-Caffeoyl)sophoroside	Flavonoids	Flavonols	-	1	507680	431700	471440	230330	156190	285850	1.03024	0.476581	-1.06921	down
Lmdp004516	C39H38O22	Kaempferol-3-O-(2''-caffeoyl)glucosyl-(1→2)-(6''-malonyl)glucoside	Flavonoids	Flavonols	-	2	107720	167350	186200	65740	51970	69800	1.04872	0.406508	-1.29864	down
Zmcn003256	C42H46O23	kaempferol-3-p-coumaroyldiglucoside-7-glucoside	Flavonoids	Flavonols	-	3	11865000	12975000	12260000	5300400	5673900	5437200	1.1392	0.442358	-1.17671	down
Zmcp002727	C42H46O24	kaempferol-3-caffcoyldiglucoside-7-glucoside	Flavonoids	Flavonols	-	1	2653400	2877300	2878300	1255500	1283700	1384400	1.13645	0.466595	-1.09976	down
Lmwp004293	C42H46O24	Quercetin-3-O-(2'''-p-coumaroyl)sophoroside-7-O-glucoside	Flavonoids	Flavonols	-	3	108370	115890	122460	49947	39817	35961	1.11925	0.362612	-1.4635	down
Hmap001882	C39H50O26	Kaempferol-3-O-sophorotrioside-7-O-glucoside	Flavonoids	Flavonols	-	2	2951200	2747700	3226500	1386000	1232800	1350400	1.13022	0.444708	-1.16907	down
Lmjp004941	C16H12O6	Rhamnocitrin (7-Methylkaempferol)	Flavonoids	Flavonols	569-92-6	1	4962200	5135100	4916000	5505300	5243500	5423300	1.01204	1.07718	0.107266	insig
Cmsp004086	C16H14O6	Dihydrokaempferide	Flavonoids	Flavonols	137225-59-3	3	122210	131660	102200	58143	88282	87964	0.924602	0.658267	-0.603256	insig
mws0038	C17H14O6	Kumatakenin	Flavonoids	Flavonols	3301-49-3	1	519080	515530	513990	539130	490290	527990	0.100404	1.00569	0.00818425	insig
Lmmn004912	C16H12O7	3-O-Methylquercetin	Flavonoids	Flavonols	1486-70-0	1	15601000	15921000	15129000	18670000	17571000	18115000	1.09513	1.16516	0.220531	insig
mws0917	C17H14O7	3,7-Di-O-methylquercetin	Flavonoids	Flavonols	2068-02-2	2	15798000	16826000	15362000	15659000	14303000	14990000	0.747797	0.936773	-0.0942283	insig
Hmhp005160	C17H14O7	Rehderianin I	Flavonoids	Flavonols	90965-30-3	1	17582000	18965000	18382000	16552000	16565000	17808000	0.865679	0.927106	-0.109194	insig
Lmpn007255	C16H12O8	Patuletin (Quercetagetin-6-methyl ether)	Flavonoids	Flavonols	519-96-0	2	15935	10166	15632	16487	14357	17359	0.524001	1.15503	0.207934	insig
mws1003	C16H12O8	Laricitrin	Flavonoids	Flavonols	53472-37-0	3	6760.4	7126	7063.6	4604.8	5045.6	4023.5	1.09053	0.652692	-0.615525	insig
mws1002	C17H14O8	Syringetin	Flavonoids	Flavonols	4423-37-4	1	41429	48951	48197	237.54	386.01	24281	0.881969	0.179716	-2.47621	insig
mws0919	C21H20O10	Kaempferol-3-O-rhamnoside (Afzelin)(Kaempferin)	Flavonoids	Flavonols	482-39-3	3	2276.7	1831.7	2849.2	992.79	687.76	1715.9	0.906896	0.488164	-1.03456	insig
pmp000117	C22H24O9	3,5,6,7,8,3',4'-Heptamethoxyflavone	Flavonoids	Flavonols	1178-24-1	3	11963	14130	12501	27885	15020	25289	0.921534	1.76696	0.821268	insig
Lmdp003509	C20H18O11	Quercetin-3-O-xyloside (Reynoutrin)	Flavonoids	Flavonols	549-32-6	3	29705	31658	25835	25193	22479	19867	0.930657	0.774548	-0.368574	insig
mws0856	C21H20O12	Quercetin-4'-O-glucoside (Spiraeoside)	Flavonoids	Flavonols	20229-56-5	1	36499000	39121000	38274000	20148000	21475000	23826000	1.12281	0.574648	-0.799249	insig
mws1329	C21H20O12	Quercetin-7-O-glucoside	Flavonoids	Flavonols	491-50-9	1	20982000	22211000	18791000	10893000	10412000	10175000	1.12865	0.507873	-0.97746	insig
mws0091	C21H20O12	Quercetin-3-O-glucoside (Isoquercitrin)	Flavonoids	Flavonols	482-35-9	1	38087000	41008000	39377000	26184000	24605000	25737000	1.13282	0.645942	-0.630524	insig
mws0061	C21H20O12	Quercetin-3-O-galactoside (Hyperin)	Flavonoids	Flavonols	482-36-0	1	8082500	8430400	8039400	4539900	4794500	4535800	1.13897	0.564925	-0.82387	insig
Lmdp003286	C21H20O12	Isohyperoside	Flavonoids	Flavonols	35589-21-0	1	16778000	16561000	14990000	10164000	10434000	8509100	1.09818	0.60227	-0.731518	insig
pmp001309	C21H20O12	6-Hydroxykaempferol-7-O-glucoside	Flavonoids	Flavonols	-	1	15673000	14641000	13593000	9661800	9743200	9294400	1.11902	0.653641	-0.61343	insig
Lmmp003903	C23H22O12	Kaempferol-3-O-(2''-acetyl)glucoside	Flavonoids	Flavonols	-	3	30560	41020	35655	34161	19897	28293	0.70091	0.767949	-0.380918	insig
HJAP112	C23H22O12	Quercetin-3-O-(2''-acetyl)rhamnoside	Flavonoids	Flavonols	-	3	12681	15748	13876	8756.5	13208	14172	0.545157	0.85419	-0.227371	insig
Lmmn003398	C23H22O12	Kaempferol-3-O-(6''-acetyl)glucoside	Flavonoids	Flavonols	-	3	838300	810050	945590	556310	496380	630990	1.06541	0.649082	-0.623527	insig
pmn001642	C23H20O13	Kaempferol-3-O-(2''-O-acetyl)glucuronide	Flavonoids	Flavonols	-	3	412350	443910	387540	480950	425820	411220	0.483104	1.05965	0.0835849	insig
Hmln002199	C23H22O13	Quercetin-3-O-(6''-acetyl)galactoside	Flavonoids	Flavonols	-	1	554870	700590	604580	600280	515190	568500	0.582247	0.905341	-0.143467	insig
Hmcp002399	C23H24O13	Limocitrin-3-O-glucoside	Flavonoids	Flavonols	-	1	321950	312110	276600	186600	200860	194370	1.11434	0.63891	-0.646315	insig
HJAP006	C23H24O13	Syringetin-7-O-glucoside	Flavonoids	Flavonols	-	1	316720	307510	325350	195640	186650	184910	1.13729	0.597317	-0.743432	insig
pmn001644	C23H20O14	Quercetin-3-O-(2''-acetyl)glucuronide	Flavonoids	Flavonols	-	3	25658	24113	32327	49327	37154	51347	1.01348	1.67882	0.74745	insig
Lmdp004892	C24H22O14	Kaempferol-3-O-(6''-malonyl)galactoside	Flavonoids	Flavonols	-	1	1569800	1404000	1578900	770210	722310	871740	1.11893	0.519309	-0.945334	insig
Lmmp003817	C24H22O14	Kaempferol-3-O-(6''-malonyl)glucoside	Flavonoids	Flavonols	-	1	1535200	1682700	1547400	831950	813910	851480	1.13698	0.524068	-0.932175	insig
Hmln002189	C24H22O15	Quercetin-3-O-(6''-malonyl)galactoside	Flavonoids	Flavonols	-	1	2187300	2269600	2118600	2032400	2018700	1933800	1.0065	0.910182	-0.135773	insig
pmp000589	C24H22O15	Quercetin-7-O-(6''-malonyl)glucoside	Flavonoids	Flavonols	-	1	504900	503720	575120	502000	602360	463560	0.0934287	0.990011	-0.0144836	insig
HJAP064	C25H24O15	Isorhamnetin-3-O-(6''-malonylglucoside)	Flavonoids	Flavonols	-	1	180300	215500	166330	298090	337100	308800	1.08571	1.67931	0.747868	insig
Lmmp002143	C24H22O16	Gossypetin-3-O-(6''-malonyl)glucoside	Flavonoids	Flavonols	-	2	182680	153490	130870	75826	97262	83773	1.05971	0.549976	-0.862558	insig
mws1290	C30H26O13	Kaempferol-3-O-(6''-p-Coumaroyl)glucoside (Tiliroside)	Flavonoids	Flavonols	20316-62-5	3	18343	13505	12302	41567	18673	54847	0.901139	2.60673	1.38224	insig
Lmtp004044	C26H28O16	Quercetin-3-O-apiosyl(1→2)galactoside	Flavonoids	Flavonols	-	1	561940	563410	763260	364840	432920	369410	1.02754	0.618005	-0.69431	insig
Lmjp002596	C26H28O16	Quercetin-3-O-sambubioside	Flavonoids	Flavonols	83048-35-5	1	584200	543500	642320	408950	385200	378170	1.10439	0.66232	-0.594399	insig
mws0059	C27H30O16	Quercetin-3-O-rutinoside (Rutin)	Flavonoids	Flavonols	153-18-4	3	1371600	1310300	1392800	810100	818520	927120	1.12007	0.627222	-0.672953	insig
Lmsp004166	C27H30O16	Quercetin-3-O-glucoside-7-O-rhamnoside	Flavonoids	Flavonols	-	3	482790	524140	476820	540130	619780	620710	0.974958	1.20008	0.263132	insig
pmn001583	C27H30O16	Quercetin-3-O-robinobioside	Flavonoids	Flavonols	52525-35-6	3	2248700	1800900	2148300	1148300	1333900	1325200	1.08069	0.614305	-0.702973	insig
Lmyn001269	C27H30O16	Kaempferol-3-O-sophoroside	Flavonoids	Flavonols	19895-95-5	2	88221	103590	92388	63117	59587	63442	1.10949	0.654985	-0.610467	insig
Lmmp002463	C28H32O16	Sexangularetin-3-O-glucoside-7-O-rhamnoside	Flavonoids	Flavonols	-	3	131300	110110	117740	84986	70173	55988	1.02757	0.587908	-0.766339	insig
Lmsp003729	C27H30O17	Myricetin-3-O-rutinoside	Flavonoids	Flavonols	-	2	387260	481310	472970	283240	494270	316580	0.60867	0.815548	-0.294159	insig
Zmdp003457	C27H30O17	Myricetin-3-O-galactoside-3'-O-rhamnoside	Flavonoids	Flavonols	-	2	325160	494790	419800	279110	387440	347140	0.612271	0.817657	-0.290433	insig
Zmhp102730	C27H30O17	6-Hydroxykaempferol 3,6-Diglucoside	Flavonoids	Flavonols	-	1	7634700	8816300	8448700	6364100	5526200	6144500	1.06961	0.724298	-0.465345	insig
Zmhp002730	C27H30O17	6-Hydroxykaempferol 6,7-Diglucoside	Flavonoids	Flavonols	142674-16-6	1	7684500	7778900	7837300	7378700	7139100	7082300	1.07261	0.927015	-0.109335	insig
MWSHY0162	C27H30O17	Quercetin-3-O-sophoroside (Baimaside)	Flavonoids	Flavonols	18609-17-1	1	10187000	9728000	10047000	8509900	7826400	7296600	1.06353	0.788762	-0.342337	insig
pmp001310	C27H30O17	6-Hydroxykaempferol-3,6-O-Diglucoside	Flavonoids	Flavonols	-	1	10572000	10131000	8949800	7673100	8035400	7506700	1.04484	0.782901	-0.353099	insig
Zmcp002666	C27H30O17	Quercetin-3,7-Di-O-glucoside	Flavonoids	Flavonols	-	1	7329300	6814000	6738900	6465800	5837000	4986700	0.879348	0.827954	-0.272378	insig
Hmcp001578	C28H32O17	Isorhamnetin-3,7-O-diglucoside	Flavonoids	Flavonols	6758-51-6	2	142090	91548	94425	130480	63950	114500	0.176261	0.941679	-0.0866929	insig
Hmgp001888	C28H32O17	Patuletin-3-O-rutinoside	Flavonoids	Flavonols	-	2	152890	112050	145270	179850	150810	144920	0.627117	1.15936	0.213325	insig
Hmgp002080	C28H32O17	Patuletin-7-O-rutinoside	Flavonoids	Flavonols	-	2	43534	26383	23332	29272	13864	21870	0.609775	0.697123	-0.520515	insig
HJN039	C30H26O17	Myricetin-3-O-(2''-galloyl-4''-acetyl)rhamnoside	Flavonoids	Flavonols	-	3	5807	5250.2	4153.1	4786.8	5055.2	4858.7	0.139949	0.966496	-0.0491638	insig
Hmcp001629	C30H32O19	Kaempferol-3-O-(6''-Malonyl)glucoside-7-O-Glucoside	Flavonoids	Flavonols	-	3	154860	145710	127310	132040	127000	112140	0.776946	0.867486	-0.205087	insig
Lmmp002995	C30H32O20	Quercetin-7-O-(2''-malonyl)glucosyl-5-O-glucoside	Flavonoids	Flavonols	-	1	13216000	13060000	13738000	15469000	13755000	12992000	0.495301	1.05503	0.077285	insig
pmb0706	C30H32O20	Quercetin-3-O-(6''-malonyl)glucosyl-5-O-glucoside	Flavonoids	Flavonols	-	1	429060	350600	375600	320630	202300	272930	0.905557	0.688901	-0.537631	insig
pmb0709	C30H32O20	Quercetin-7-O-(6''-malonyl)glucosyl-5-O-glucoside	Flavonoids	Flavonols	-	1	31354	42978	32332	29511	40559	30756	0.226782	0.945267	-0.0812056	insig
Hmcp001658	C31H34O20	Isorhamnetin-3-O-(6''-malonylglucoside)-7-O-glucoside	Flavonoids	Flavonols	-	2	17356	15560	22726	20298	16735	9723.9	0.438423	0.840317	-0.250995	insig
Lnrp102163	C33H40O20	Quercetin-3-O-rutinoside-7-O-rhamnoside	Flavonoids	Flavonols	-	2	1008200	867070	1124000	559650	571590	589680	1.10022	0.57378	-0.801431	insig
pmp001105	C33H40O20	Kaempferol-3-O-neohesperidoside-7-O-glucoside	Flavonoids	Flavonols	-	1	106030	119020	105350	74642	66342	70389	1.11197	0.639749	-0.644423	insig
HJAP127	C33H40O20	Quercetin-3-O-(2''-O-Rhamnosyl)rutinoside	Flavonoids	Flavonols	55696-57-6	2	1206900	940390	1124600	713490	583160	531140	1.06242	0.558634	-0.840024	insig
Hmcp001329	C32H38O21	Quercetin-3-O-xylosyl(1→2)glucosyl(1→2)glucoside	Flavonoids	Flavonols	-	2	102830	112360	95010	94510	84082	91318	0.86346	0.870116	-0.20072	insig
HJAP119	C34H42O20	Rhamnetin-3-O-Rutinoside-5-O-rhamnoside	Flavonoids	Flavonols	-	3	204920	244700	361050	218320	165820	334090	0.281055	0.885971	-0.174669	insig
HJAP128	C34H42O20	Isorhamnetin-3-O-rutinoside-7-O-rhamnoside	Flavonoids	Flavonols	-	3	3815600	4082800	4207500	2401000	2500900	2818000	1.10922	0.637697	-0.649056	insig
pmp001314	C33H40O21	6-Hydroxykaempferol-3-O-rutin-6-O-glucoside	Flavonoids	Flavonols	-	2	41103	58752	45056	52664	26575	44124	0.428537	0.851302	-0.232257	insig
Zmhp002640	C33H40O21	6-Hydroxykaempferol 3-Rutinoside-6-glucoside	Flavonoids	Flavonols	-	2	4556800	4768200	4769800	3176500	2885600	2804500	1.12491	0.629069	-0.66871	insig
Lmmp002755	C33H40O21	Quercetin-7-O-rutinoside-4'-O-glucoside	Flavonoids	Flavonols	-	2	152290	138990	186470	123910	140090	145560	0.684719	0.857268	-0.222181	insig
Lmmp002334	C33H40O21	Quercetin-3-O-rutinoside-7-O-glucoside	Flavonoids	Flavonols	-	2	4724100	4887000	4492800	3109700	2798600	2958400	1.12617	0.62867	-0.669625	insig
Lmdp004668	C37H38O19	Kaempferol-3-O-(6''-Feruloyl)glucosyl-(1→4)-galactoside	Flavonoids	Flavonols	-	2	2978800	2907300	2465100	2305100	2208100	2213100	0.990794	0.805429	-0.31217	insig
Lmsp003790	C34H42O21	Isorhamnetin-3-O-sophoroside-7-O-rhamnoside	Flavonoids	Flavonols	41328-75-0	1	132730	180490	60628	168960	154540	140230	0.483972	1.24042	0.310833	insig
Hmcp004055	C33H40O22	Quercetin-5,7,4'-tri-O-glucoside	Flavonoids	Flavonols	-	3	16466000	16435000	14479000	10003000	10301000	10194000	1.12107	0.643689	-0.635564	insig
Lmdp004574	C37H38O20	Quercetin-3-O-(2'''-Feruloyl)sophoroside	Flavonoids	Flavonols	-	1	27084	53879	45880	58260	64786	50095	0.703207	1.365	0.448903	insig
HJAP126	C35H44O22	Syringetin-3-O-rutinoside-7-O-glucoside	Flavonoids	Flavonols	-	2	95001	89861	90294	50057	48794	60081	1.10938	0.577607	-0.79184	insig
Lmqp002349	C36H42O24	Kaempferol-3-O-(6''''-malonyl)sophorotrioside	Flavonoids	Flavonols	-	1	3655500	3859400	3414800	2360100	2569200	2346100	1.11517	0.665654	-0.587155	insig
Lmdp004221	C39H38O23	Quercetin-3-O-(2''-Caffeoyl)glucoside-(1→2)-(6''-Malonyl)glucoside	Flavonoids	Flavonols	-	2	113000	144260	115640	100580	85375	53977	0.864345	0.643422	-0.636163	insig
Lmhp002374	C39H50O25	Quercetin-3-O-glucosyl(1→4)rhamnoside-7-O-rutinoside	Flavonoids	Flavonols	-	2	298860	281970	303530	249670	250830	244620	1.10055	0.842553	-0.247161	insig
Hmcp001529	C38H48O26	Quercetin-3-O-sophorotrioside-7-O-arabinoside	Flavonoids	Flavonols	-	3	18279	17218	17716	11162	13694	8610.8	0.996691	0.628922	-0.669048	insig
Lmsp004090	C43H48O23	Isorhamnetin-3-O-(6''-O-p-coumarol)sophoroside-7-O-rhamnoside	Flavonoids	Flavonols	-	2	7839100	8391900	8127000	6685800	6273400	6300200	1.10989	0.790681	-0.338833	insig
Lmdp004011	C42H46O24	Quercetin-3-O-(6''-Caffeoyl)sophoroside-7-O-rhamnoside	Flavonoids	Flavonols	-	3	42022	53226	45741	21169	32362	30110	1.00134	0.593245	-0.7533	insig
Cwjp002007	C43H48O24	Kaempferol-3-O-sophoroside-7-O-(2''-Feruloyl)glucoside	Flavonoids	Flavonols	-	3	479830	431730	366190	343740	372720	316290	0.85894	0.808257	-0.307115	insig
Zmcn003169	C43H48O24	kaempferol-3-feruloyldiglucoside-7-glucoside	Flavonoids	Flavonols	-	1	3775500	3970600	3887000	3549400	3425100	3526100	1.0756	0.902648	-0.147764	insig
Hmap001789	C39H50O27	Quercetin-3-O-gentiotetroside	Flavonoids	Flavonols	-	2	3446500	3758500	3420600	2612800	2571800	2710700	1.11378	0.743045	-0.428478	insig
Hmmp002240	C40H50O27	Isorhamnetin-3-O-rutinoside-7-O-(2''-O-glucosyl)glucuronate	Flavonoids	Flavonols	-	1	5087400	4945300	5078500	3244100	2926000	2487700	1.10056	0.572939	-0.803546	insig
Lmjp003295	C22H22O12	6-Methoxykaempferol-3-O-glucoside	Flavonoids	Flavonols	63422-27-5	1	848160	782830	873960	1900700	1881000	1913600	1.13897	2.27362	1.18499	up
Lmjp003044	C22H22O12	Isorhamnetin-3-O-Glucoside	Flavonoids	Flavonols	5041-82-7	1	1306100	1149200	1054700	2855400	2613000	2517500	1.1257	2.27519	1.18598	up
Hmcp002207	C22H22O12	Isorhamnetin-7-O-glucoside (Brassicin)	Flavonoids	Flavonols	6743-96-0	1	722570	826560	916330	1846200	1896000	1586400	1.11354	2.1613	1.1119	up
Lmjp002906	C22H22O12	Rhamnetin-3-O-Glucoside	Flavonoids	Flavonols	27875-34-9	1	759790	944500	768570	1857700	1768000	1736400	1.12255	2.16838	1.11662	up
Hmcp002187	C23H24O13	Limocitrin-3-O-galactoside	Flavonoids	Flavonols	-	1	849160	960930	1038300	1941800	2079900	1716500	1.11268	2.01454	1.01045	up
Li512111	C24H24O13	Isorhamnetin-3-O-(6''-acetylglucoside)	Flavonoids	Flavonols	-	2	44347	46455	45081	116720	100300	100470	1.13446	2.3365	1.22435	up
Hmln001682	C29H32O18	Quercetin-3-O-(6''-acetyl)glucosyl-(1→3)-Galactoside	Flavonoids	Flavonols	-	3	1339.8	1366.7	1044.8	1937.5	2568.7	3355.6	1.02064	2.09575	1.06747	up
MWSslk210	C18H16O8	Irigenin	Flavonoids	Isoflavones	548-76-5	1	1828300	1897300	1832800	820620	900120	836240	1.13939	0.460021	-1.12023	down
Zmdp005767	C25H24O12	Formononetin-7-O-(6''-Malonyl)glucoside	Flavonoids	Isoflavones	-	3	71121	69429	78436	34889	35875	38281	1.1326	0.497954	-1.00592	down
Lmgp004474	C27H30O14	Genistein-7-O-galactoside-rhamnose	Flavonoids	Isoflavones	-	2	3304.8	1323	1984.2	9	9	9	1.13695	0.00408348	-7.93598	down
pmp000548	C16H12O6	Pratensein	Flavonoids	Isoflavones	2284-31-3	2	5026100	5085400	4940100	5571300	5355500	5422300	1.08012	1.0862	0.119294	insig
Hmgp003130	C17H14O7	Iristectorigenin A	Flavonoids	Isoflavones	-	1	18196000	18318000	18080000	16886000	16991000	17310000	1.10647	0.937594	-0.092965	insig
MWS20190	C18H16O8	5,7,4'-trihydroxy-6,3',5'-trimethoxyisoflavone	Flavonoids	Isoflavones	-	1	3817600	4058500	3891100	1971300	2107200	2025200	1.13922	0.518705	-0.947015	insig
Lmgp004731	C21H20O10	Genistein-7-O-galactoside	Flavonoids	Isoflavones	-	3	20947	15939	14358	11630	14886	10781	0.830717	0.727832	-0.458324	insig
Lmgp003546	C23H24O12	4',5'-Dihydroxy-6,8-dimethoxyisoflavone-7-O-galactoside	Flavonoids	Isoflavones	-	1	3565300	3709100	3578500	6816200	6573200	7073800	1.13917	1.88551	0.914951	insig
Cmyp005222	C23H24O12	Iristectorin A	Flavonoids	Isoflavones	37744-61-9	1	3636100	3990900	3725500	7204600	6268500	7545900	1.12014	1.85149	0.888684	insig
pmp001165	C24H26O13	Iridin	Flavonoids	Isoflavones	491-74-7	1	42503	47709	41329	48666	36053	44189	0.145068	0.979983	-0.0291707	insig
Lmhp002800	C28H32O17	2'-Hydoxy,5-methoxyGenistein-4',7-O-diglucoside	Flavonoids	Isoflavones	-	2	181230	181780	189450	159880	170400	145940	0.968525	0.861999	-0.214242	insig
Lmgp004332	C35H44O20	5,7,4'-Trihydroxy-6,8-dimethoxyisoflavone-7-O-galactoside-rhamnose-rhamnose	Flavonoids	Isoflavones	-	2	11813000	10778000	11800000	9980900	8646000	9383500	1.0196	0.814469	-0.296068	insig
pme0309	C8H8O5	3-O-Methylgallic Acid	Tannins	Tannin	3934-84-7	3	243650	241760	207850	248270	235710	225080	0.232159	1.02279	0.0325112	insig
Hmdn001667	C20H16O13	Ellagic acid-4-O-glucoside	Tannins	Tannin	-	2	81012	87131	73219	64779	63057	63202	1.04501	0.7915	-0.337339	insig
Lmfn000604	C13H16O10	6-O-Galloyl-D-glucose*	Tannins	Tannin	13186-19-1	1	615320	587030	506700	4305300	3908700	4747800	1.13901	7.58421	2.923	up
Hmln000659	C13H16O10	3-O-Galloyl-D-glucose*	Tannins	Tannin	-	1	733360	697320	573410	6109400	6148300	5019000	1.1376	8.62072	3.10781	up
Hmln000873	C13H16O10	2-O-Galloyl-D-glucose*	Tannins	Tannin	-	1	781020	744680	797470	7118100	6471500	6489100	1.142	8.6428	3.1115	up
