# Supplementary material for: Shikimate Kinase Plays Important Roles in Anthocyanin Synthesis in Petunia
Source: Int J Mol Sci. 2022 Dec 15;23(24):15964. doi: 10.3390/ijms232415964 (PMC9786173; doi:10.3390/ijms232415964)
Supplement: Supplementary file 1 [file ijms-23-15964-s001.zip › Supplemental Data File 2.xlsx]

## Sheet: Sheet1
Supporting Information Data 2 Differential flavonoids metabolites in PhSK-silenced corollas and control in petunia
Index	Formula	Compounds	Class I	Class II	CAS	Level	pTRV2-1	pTRV2-2	pTRV2-3	pTRV2-PhCS-1	pTRV2-PhCS-2	pTRV2-PhCS-3	VIP	Fold_Change	Log2FC	Type
pmb0550	C21H21O11+	Cyanidin-3-O-glucoside (Kuromanin)	Flavonoids	Anthocyanidins	47705-70-4	1	16922000	22835000	16670000	9088000	8051300	9854900	1.08703	0.478392	-1.06374	down
Lmhp002242	C33H41O20+	Cyanidin-3-O-(2''-O-glucosyl)rutinoside	Flavonoids	Anthocyanidins	-	3	8233	6965.9	8894.3	3482.9	3133.6	4477.1	1.08516	0.460445	-1.1189	down
Zmcp002986	C33H41O21+	Cyanidin-3-O-sophoroside-5-O-glucoside	Flavonoids	Anthocyanidins	47888-56-2	1	8953100	9611200	9235700	4926800	3994500	4441600	1.12491	0.48068	-1.05685	down
Zmqp002952	C33H41O21+	Delphinidin-3-O-rutinoside-7-O-glucoside	Flavonoids	Anthocyanidins	-	1	721710	710900	724920	346220	351760	368890	1.14075	0.494487	-1.016	down
Zmcp002723	C36H43O24+	Cyanidin-3-O-(6''-O-malonyl)sophoroside-5-O-glucoside	Flavonoids	Anthocyanidins	63003-09-8	1	929080	725180	765150	328220	311510	508850	1.04065	0.474736	-1.0748	down
Lmqp002290	C42H47O24+	Cyanidin-3,3'-di-O-glucoside-7-O-(6''-O-caffeoyl)glucoside	Flavonoids	Anthocyanidins	-	1	25183000	25791000	26515000	12069000	12185000	12688000	1.14069	0.476739	-1.06873	down
pme2960	C15H12O5	Naringenin chalcone	Flavonoids	Chalcones	73692-50-9	1	1339100	1448000	1348700	367030	363200	361780	1.14174	0.264038	-1.92118	down
Lmgn002933	C18H18O7	5,7-Dihydroxy-2',3',4'-trimethoxydihydroisoflavone	Flavonoids	Dihydroisoflavones	-	2	9960200	10153000	10143000	1974800	2060700	2030800	1.14244	0.200498	-2.31834	down
mws0042	C15H14O7	Epigallocatechin	Flavonoids	Flavanols	970-74-1	3	110110	113890	123330	12218	11148	10179	1.14077	0.0965796	-3.37214	down
pme3475	C15H12O5	Butin	Flavonoids	Flavanones	492-14-8	1	403670	502980	471970	183350	198610	183040	1.12883	0.40983	-1.2869	down
MWSHY0137	C15H12O5	Naringenin (5,7,4'-Trihydroxyflavanone)	Flavonoids	Flavanones	480-41-1	1	454480	426080	418060	170680	212960	181610	1.12727	0.43527	-1.20002	down
mws1179	C21H22O10	Naringenin-7-O-glucoside (Prunin)	Flavonoids	Flavanones	529-55-5	1	1868300	1870100	1861700	789970	720300	682200	1.1375	0.391506	-1.3529	down
Lmzp002365	C22H24O11	Hesperetin-7-O-glucoside	Flavonoids	Flavanones	31712-49-9	3	13286000	14374000	12729000	6194900	6256000	5462400	1.13186	0.443519	-1.17293	down
pmb0686	C24H24O14	Eriodictyol-7-O-(6''-malonyl)glucoside	Flavonoids	Flavanones	-	3	31613	34925	36757	18791	16043	16419	1.12209	0.496181	-1.01106	down
Hmmn002379	C39H52O25	Eriodictyol-7-O-rutinoside-4'-O-Sophoroside	Flavonoids	Flavanones	-	3	220310	225910	230390	86863	78476	81092	1.13987	0.364214	-1.45714	down
mws0914	C15H12O5	Pinobanksin	Flavonoids	Flavanonols	548-82-3	1	1257900	1227800	1235300	321310	320850	356190	1.14087	0.268302	-1.89807	down
Lmtn002796	C21H22O11	Aromadendrin-7-O-glucoside	Flavonoids	Flavanonols	28189-90-4	1	187270	225110	198700	82647	65839	64262	1.12344	0.348151	-1.52222	down
Hmcn002875	C15H10O7	6-Hydroxyluteolin	Flavonoids	Flavones	18003-33-3	3	16385	16899	16292	5044.3	4694.7	4429.1	1.14013	0.285785	-1.807	down
mws0920	C15H10O7	Tricetin (5,7,3',4',5'-Pentahydroxyflavone)	Flavonoids	Flavones	520-31-0	2	24274	22595	20174	9648.6	10828	10358	1.1279	0.459923	-1.12054	down
Zmhp002734	C17H14O8	5,7,2',5'-Tetrahydroxy-8,6'-dimethoxyflavone	Flavonoids	Flavones	-	2	94913	91254	84479	28355	29780	34024	1.13464	0.340515	-1.55421	down
pmp000009	C18H16O8	Centaureidin (5,7,3'-Trihydroxy-3,6,4'-Trimethoxyflavone)	Flavonoids	Flavones	17313-52-9	1	36532	42396	39640	19129	17909	19328	1.13256	0.47539	-1.07282	down
Lmxn007456	C18H16O8	Acerosin	Flavonoids	Flavones	15835-74-2	1	1812400	1765400	1744900	866240	888620	865230	1.14168	0.492248	-1.02254	down
Lmbp003668	C20H18O10	Kaempferol-3-O-arabinoside	Flavonoids	Flavones	-	3	7572.3	7776.1	8787.5	9	9	9	1.14242	0.00111867	-9.80401	down
MWSHY0040	C21H20O10	Oroxin A	Flavonoids	Flavones	57396-78-8	3	3666.1	4352.6	4192.8	9	9	9	1.14238	0.00221103	-8.82107	down
MWS20148	C21H20O10	Apigenin-3'-O-α-D-glucopyranoside	Flavonoids	Flavones	-	3	18805	27234	21785	6898.5	6657.6	8682.4	1.10997	0.327885	-1.60874	down
MWSHY0104	C21H20O11	Luteolin-7-O-glucoside (Cynaroside)	Flavonoids	Flavones	5373-11-5	1	1755500	2604100	3043700	1124300	858000	1152300	1.04182	0.423406	-1.23989	down
Hmpp003270	C21H20O11	Luteolin-4'-O-glucoside*	Flavonoids	Flavones	6920-38-3	1	897370	730080	742490	447790	377360	351150	1.09949	0.496342	-1.01059	down
pmb3012	C22H22O11	Chrysoeriol-7-O-glucoside	Flavonoids	Flavones	19993-32-9	3	152580	138710	131830	72015	59762	62183	1.12327	0.458404	-1.12531	down
pmb3000	C24H24O12	Chrysoeriol-7-O-(6''-acetyl)glucoside	Flavonoids	Flavones	-	3	6944.8	10509	8352.2	9	9	9	1.14189	0.00104627	-9.90053	down
pmp000013	C24H26O12	Eupatilin-7-O-glucoside	Flavonoids	Flavones	-	1	53264	59496	61140	6000.9	4146	7454.3	1.1291	0.101214	-3.30451	down
pmp000593	C27H30O15	Luteolin-7-O-rutinoside	Flavonoids	Flavones	3563-98-2	2	279470	290120	269030	143480	128340	131850	1.13536	0.48135	-1.05484	down
MWSHY0080	C27H30O15	Luteolin-7-O-neohesperidoside (Lonicerin)	Flavonoids	Flavones	25694-72-8	1	1105800	1140600	1097600	492290	506110	615440	1.12176	0.482608	-1.05108	down
Hmjp002999	C28H32O16	Isorhamnetin-3-O-rutinoside (Narcissin)	Flavonoids	Flavones	604-80-8	3	119090	159280	151950	70196	79156	54614	1.06958	0.473987	-1.07708	down
HJAP120	C28H32O16	Rhamnetin-3-O-Rutinoside	Flavonoids	Flavones	-	3	153530	163300	140520	73202	75576	70550	1.13314	0.479563	-1.06021	down
Zmzp002265	C27H30O18	artemisidin A	Flavonoids	Flavones	-	1	247420	226650	239750	57386	96987	82343	1.10176	0.331619	-1.5924	down
Hmqp003184	C29H30O18	Luteolin-7-O-(6''-malonyl)glucoside-5-O-arabinoside	Flavonoids	Flavones	-	3	37829	36500	41649	20242	21463	14847	1.0845	0.48761	-1.0362	down
Hmlp003185	C30H32O18	Luteolin-7-O-(6''-malonyl)glucoside-5-O-rhamnoside	Flavonoids	Flavones	-	3	75860	72343	53206	26943	30178	25096	1.10107	0.408209	-1.29262	down
Hmmn003584	C33H40O19	Luteolin-7-O-rutinoside-5-O-rhamnoside	Flavonoids	Flavones	-	1	97775	89156	99969	23502	21759	23359	1.14023	0.239177	-2.06385	down
Hmmp002322	C40H52O24	Chrysoeriol-5,7-di-O-rutinoside	Flavonoids	Flavones	-	1	186170	209860	189170	79288	107290	99609	1.10368	0.489041	-1.03197	down
pmb0660	C36H36O18	Isoorientin-7-O-(6''-p-coumaroyl)glucoside	Flavonoids	Flavonoid carbonoside	-	3	6151600	4486400	4253100	1711800	1523000	1537100	1.11642	0.320453	-1.64181	down
MWSHY0051	C15H10O6	Kaempferol (3,5,7,4'-Tetrahydroxyflavone)	Flavonoids	Flavonols	520-18-3	1	38633	45201	46491	4524.7	5375.1	6107.6	1.13726	0.122827	-3.0253	down
MWSHY0102	C15H10O7	Quercetin	Flavonoids	Flavonols	117-39-5	1	32781	34082	26451	7505.4	10151	10752	1.11468	0.304439	-1.71578	down
mws0988	C16H12O7	Rhamnetin	Flavonoids	Flavonols	90-19-7	2	17624	17869	17042	9	9	9	1.14252	0.000513943	-10.9261	down
mws0032	C15H10O8	Myricetin	Flavonoids	Flavonols	529-44-2	2	18887	21489	20750	3542.2	3694.3	5769	1.11954	0.212765	-2.23266	down
MWSHY0136	C21H20O11	Kaempferol-3-O-glucoside (Astragalin)	Flavonoids	Flavonols	480-10-4	1	4261900	5731600	5293400	1829300	1916900	1768100	1.12468	0.360721	-1.47105	down
mws0913	C21H20O11	Kaempferol-3-O-galactoside (Trifolin)	Flavonoids	Flavonols	23627-87-4	1	4458600	4959600	4613200	1573600	1544400	1347700	1.13674	0.318265	-1.6517	down
pmn001640	C20H18O12	Myricetin-3-O-arabinoside*	Flavonoids	Flavonols	132679-85-7	3	25004	26117	19480	4949.9	5469.8	6066.4	1.13022	0.233511	-2.09844	down
Lmzn001894	C21H18O12	Kaempferol-3-O-glucuronide	Flavonoids	Flavonols	22688-78-4	3	24097	21692	28099	13801	9875.8	12861	1.07439	0.494502	-1.01595	down
Lmmp001947	C21H20O13	Gossypetin-3-O-glucoside	Flavonoids	Flavonols	-	1	2125200	2036700	2429300	500190	466180	379730	1.13371	0.204227	-2.29176	down
Lmdp002969	C21H20O13	Myricetin-3-O-galactoside	Flavonoids	Flavonols	15648-86-9	1	2034800	2268200	1999900	482450	662450	372830	1.11275	0.240799	-2.0541	down
Lmfp003403	C21H20O13	Quercetagetin-7-O-glucoside	Flavonoids	Flavonols	548-75-4	1	1918700	2114200	2322000	449470	557280	460940	1.13497	0.230954	-2.11432	down
Lmpp003465	C21H20O13	Myricetin-3-O-glucoside	Flavonoids	Flavonols	19833-12-6	1	2188400	2198300	1829600	440740	520110	310640	1.11984	0.204541	-2.28954	down
HJAP148	C26H28O15	Kaempferol-3-O-sambubioside	Flavonoids	Flavonols	27661-51-4	2	165480	181250	183760	81449	85586	61728	1.10824	0.43123	-1.21347	down
pme1605	C27H30O15	Kaempferol-3-O-robinobioside(Biorobin)	Flavonoids	Flavonols	17297-56-2	2	995670	995870	953990	445350	394860	374330	1.13397	0.412333	-1.27812	down
MWSslk254	C27H30O15	Kaempferol-3-O-glucorhamnoside	Flavonoids	Flavonols	40437-72-7	1	1021100	1207200	1048500	518230	571310	462190	1.11768	0.47355	-1.07841	down
Lmsn002815	C27H30O15	Kaempferol-3-O-rutinoside(Nicotiflorin)	Flavonoids	Flavonols	17650-84-9	1	286410	289770	254270	124550	103380	119010	1.12762	0.417773	-1.25921	down
MWSHY0061	C27H30O15	Kaempferol-3-O-neohesperidoside	Flavonoids	Flavonols	32602-81-6	1	1005800	1082100	1082500	444740	536560	404150	1.11929	0.436995	-1.19431	down
Lmyp004052	C30H26O14	Quercetin-3-O-(6''-p-Coumaroyl)galactoside	Flavonoids	Flavonols	-	2	247500	225160	236040	50309	49427	36400	1.13276	0.192093	-2.38013	down
Lmdp004267	C30H26O14	Quercetin-3-O-(6''-p-Coumaroyl)glucoside	Flavonoids	Flavonols	-	2	259040	269140	265840	53793	55510	42783	1.13693	0.191539	-2.38429	down
Lmbp002592	C27H30O16	Kaempferol-3,7-di-O-glucoside	Flavonoids	Flavonols	-	1	8995900	8416600	7505300	4147400	4619700	3563100	1.10596	0.494835	-1.01498	down
Hmln001836	C29H32O17	Kaempferol-3-O-(6''-Acetyl)glucosyl-(1→3)-Galactoside	Flavonoids	Flavonols	-	3	293010	287510	298480	99231	108690	103220	1.14104	0.353972	-1.49829	down
Zmcn004806	C36H36O18	kaempferol-3-p-coumaroyldiglucoside	Flavonoids	Flavonols	-	1	179730	183880	171940	63862	57737	54189	1.1374	0.328238	-1.60718	down
Lmsp003161	C33H40O20	Kaempferol-3-O-sophoroside-7-O-rhamnoside	Flavonoids	Flavonols	-	2	47427	56254	62032	25025	18910	18401	1.10605	0.376168	-1.41055	down
Lmpp003268	C33H40O20	Kaempferol-3-O-rutinoside-7-O-glucoside	Flavonoids	Flavonols	-	2	112370	109950	96277	40862	60495	45516	1.08892	0.460999	-1.11716	down
Lmyp005280	C37H38O18	Isorhamnetin-3-O-[2'''-O-(6''-p-coumaryl)glucosyl]rhamnoside	Flavonoids	Flavonols	-	2	484510	475350	499150	111320	103600	109280	1.14169	0.222205	-2.17003	down
Lmdp004336	C36H36O19	Kaempferol-3-O-(6'''-Caffeoyl)glucosyl-(1→2)-Galactoside	Flavonoids	Flavonols	-	2	5826800	4358600	6909300	1847600	2468000	2153600	1.08557	0.378433	-1.40189	down
Zmcn004206	C36H36O19	kaempferol-3-caffeoyldiglucoside	Flavonoids	Flavonols	-	2	8380200	8258000	7933600	3121800	3143700	3156200	1.14185	0.383435	-1.38294	down
Lmwp003888	C33H40O21	Kaempferol-3-O-sophoroside-7-O-glucoside	Flavonoids	Flavonols	-	3	359450	312820	403410	153600	191270	170880	1.10514	0.479464	-1.06051	down
Lmdp004160	C36H36O20	Quercetin-3-O-(2'''-Caffeoyl)sophoroside	Flavonoids	Flavonols	-	1	507680	431700	471440	230330	156190	285850	1.03024	0.476581	-1.06921	down
Lmdp004516	C39H38O22	Kaempferol-3-O-(2''-caffeoyl)glucosyl-(1→2)-(6''-malonyl)glucoside	Flavonoids	Flavonols	-	2	107720	167350	186200	65740	51970	69800	1.04872	0.406508	-1.29864	down
Zmcn003256	C42H46O23	kaempferol-3-p-coumaroyldiglucoside-7-glucoside	Flavonoids	Flavonols	-	3	11865000	12975000	12260000	5300400	5673900	5437200	1.1392	0.442358	-1.17671	down
Zmcp002727	C42H46O24	kaempferol-3-caffcoyldiglucoside-7-glucoside	Flavonoids	Flavonols	-	1	2653400	2877300	2878300	1255500	1283700	1384400	1.13645	0.466595	-1.09976	down
Lmwp004293	C42H46O24	Quercetin-3-O-(2'''-p-coumaroyl)sophoroside-7-O-glucoside	Flavonoids	Flavonols	-	3	108370	115890	122460	49947	39817	35961	1.11925	0.362612	-1.4635	down
Hmap001882	C39H50O26	Kaempferol-3-O-sophorotrioside-7-O-glucoside	Flavonoids	Flavonols	-	2	2951200	2747700	3226500	1386000	1232800	1350400	1.13022	0.444708	-1.16907	down
MWSslk210	C18H16O8	Irigenin	Flavonoids	Isoflavones	548-76-5	1	1828300	1897300	1832800	820620	900120	836240	1.13939	0.460021	-1.12023	down
Zmdp005767	C25H24O12	Formononetin-7-O-(6''-Malonyl)glucoside	Flavonoids	Isoflavones	-	3	71121	69429	78436	34889	35875	38281	1.1326	0.497954	-1.00592	down
Lmgp004474	C27H30O14	Genistein-7-O-galactoside-rhamnose	Flavonoids	Isoflavones	-	2	3304.8	1323	1984.2	9	9	9	1.13695	0.00408348	-7.93598	down
Zmmp003556	C44H51O24+	Petunidin-3-O-(6''-O-feruloyl)rutinoside-5-O-glucoside	Flavonoids	Anthocyanidins	-	3	62072	45941	47534	114220	105480	94173	1.09147	2.01787	1.01283	up
mws0789	C15H12O4	Pinocembrin (Dihydrochrysin)	Flavonoids	Flavanones	480-39-7	1	804.11	1574.1	957.96	2447.7	2953.8	2323.8	1.02532	2.31562	1.2114	up
mws0058	C16H12O6	Diosmetin (5,7,3'-Trihydroxy-4'-methoxyflavone)	Flavonoids	Flavanones	520-34-3	1	63027	60368	59704	253710	204230	218990	1.13723	3.69707	1.88638	up
HJN104	C21H22O13	Dihydromyricetin-3-O-glucoside	Flavonoids	Flavanonols	-	2	568190	567990	568990	2871300	2977000	3074100	1.14213	5.23256	2.38752	up
Zmhn003257	C16H12O6	5,7,2'-Trhiyroxy-8-methoxyflavone	Flavonoids	Flavones	-	1	57510	59739	59199	248250	210800	212350	1.13906	3.80509	1.92793	up
mws0055	C20H20O7	Tangeretin (4',5,6,7,8-Pentamethoxyflavone)	Flavonoids	Flavones	481-53-8	2	120380	139150	119850	1833200	942370	1904700	1.12327	12.3366	3.62488	up
mws0043	C21H22O8	Nobiletin (5,6,7,8,3',4'-Hexamethoxyflavone)	Flavonoids	Flavones	478-01-3	2	240730	260350	238110	1830200	742880	1566500	1.08374	5.60016	2.48547	up
pma0825	C24H22O12	Chrysin-7-O-(6''-malonyl)glucoside	Flavonoids	Flavones	-	3	4169.8	5408.5	5641.8	25424	22930	29387	1.13067	5.10779	2.3527	up
pmb0608	C25H24O14	Chrysoeriol-7-O-(6''-malonyl)glucoside	Flavonoids	Flavones	-	3	11883	11410	10710	35442	32961	29723	1.13564	2.8858	1.52897	up
Zmxp005470	C26H26O15	Tricin-7-O-(6''-O-malonyl)glucoside	Flavonoids	Flavones	-	1	349950	390900	377140	890120	843950	858880	1.13839	2.3193	1.21369	up
Lmpp003930	C30H26O12	Apigenin-7-O-(6''-p-Coumaryl)glucoside	Flavonoids	Flavones	-	2	9	9	9	945090	3929	6603.5	1.05046	35393.4	15.1112	up
pme0368	C27H30O14	Apigenin-7-O-rutinoside (Isorhoifolin)	Flavonoids	Flavones	552-57-8	2	9	9	9	887720	4593	6280	1.05468	33281.2	15.0224	up
mws0047	C27H30O14	Apigenin-7-O-neohesperidoside (Rhoifolin)	Flavonoids	Flavones	17306-46-6	2	9	9	9	1008600	4631.1	12802	1.06467	38001.2	15.2138	up
Lmyp004318	C30H26O13	Kaempferol-3-O-(6''-p-Coumaroyl)galactoside	Flavonoids	Flavones	-	3	9	9	9	183450	2999.2	6875.3	1.08428	7160.17	12.8058	up
pmb3014	C31H30O15	Luteolin-7-O-(6''-eudesmyl)glucoside	Flavonoids	Flavones	-	3	5951.5	6396.7	8401	44356	38499	42196	1.13394	6.02679	2.59139	up
Lmjp003295	C22H22O12	6-Methoxykaempferol-3-O-glucoside	Flavonoids	Flavonols	63422-27-5	1	848160	782830	873960	1900700	1881000	1913600	1.13897	2.27362	1.18499	up
Lmjp003044	C22H22O12	Isorhamnetin-3-O-Glucoside	Flavonoids	Flavonols	5041-82-7	1	1306100	1149200	1054700	2855400	2613000	2517500	1.1257	2.27519	1.18598	up
Hmcp002207	C22H22O12	Isorhamnetin-7-O-glucoside (Brassicin)	Flavonoids	Flavonols	6743-96-0	1	722570	826560	916330	1846200	1896000	1586400	1.11354	2.1613	1.1119	up
Lmjp002906	C22H22O12	Rhamnetin-3-O-Glucoside	Flavonoids	Flavonols	27875-34-9	1	759790	944500	768570	1857700	1768000	1736400	1.12255	2.16838	1.11662	up
Hmcp002187	C23H24O13	Limocitrin-3-O-galactoside	Flavonoids	Flavonols	-	1	849160	960930	1038300	1941800	2079900	1716500	1.11268	2.01454	1.01045	up
Li512111	C24H24O13	Isorhamnetin-3-O-(6''-acetylglucoside)	Flavonoids	Flavonols	-	2	44347	46455	45081	116720	100300	100470	1.13446	2.3365	1.22435	up
Hmln001682	C29H32O18	Quercetin-3-O-(6''-acetyl)glucosyl-(1→3)-Galactoside	Flavonoids	Flavonols	-	3	1339.8	1366.7	1044.8	1937.5	2568.7	3355.6	1.02064	2.09575	1.06747	up
Lmfn000604	C13H16O10	6-O-Galloyl-D-glucose*	Tannins	Tannin	13186-19-1	1	615320	587030	506700	4305300	3908700	4747800	1.13901	7.58421	2.923	up
Hmln000659	C13H16O10	3-O-Galloyl-D-glucose*	Tannins	Tannin	-	1	733360	697320	573410	6109400	6148300	5019000	1.1376	8.62072	3.10781	up
Hmln000873	C13H16O10	2-O-Galloyl-D-glucose*	Tannins	Tannin	-	1	781020	744680	797470	7118100	6471500	6489100	1.142	8.6428	3.1115	up
