# Supplementary material for: Shikimate Kinase Plays Important Roles in Anthocyanin Synthesis in Petunia
Source: Int J Mol Sci. 2022 Dec 15;23(24):15964. doi: 10.3390/ijms232415964 (PMC9786173; doi:10.3390/ijms232415964)
Supplement: Supplementary file 1 [file ijms-23-15964-s001.zip › Supplemental Data File 3.xlsx]

## Sheet: Sheet1
Supporting Information Data 3 KEGG pathway analysis of differential metabolites in petunia corollas of PhSK-silenced plants and control
#Kegg_pathway	ko_id	Cluter_frequency	Metabolome_frequency	P-value	Corrected_P-value	Unique compound	compound	Uni_all	compound_all
Flavonoid biosynthesis	ko00941	12 out of 20 60%	22 out of 54 40.7407407407407%	0.0273899832337331	0.164339899402399	12	22	20	54	mws1179;mws0032;MWSHY0051;mws0914;mws0920;mws0789;pme2960;MWSHY0102;Lmzp002365;pme3475;mws0042;MWSHY0137
Flavone and flavonol biosynthesis	ko00944	9 out of 20 45%	19 out of 54 35.1851851851852%	0.193618069697692	1	4	10	20	54	MWSHY0102;MWSHY0051;MWSHY0137;pme2960
Biosynthesis of secondary metabolites	ko01110	8 out of 20 40%	19 out of 54 35.1851851851852%	0.389859560662086	1	8	19	20	54	mws0032;MWSHY0051;pme2960;MWSHY0136;MWSHY0137;Lmsn002815;mws0042;MWSHY0102
Isoflavonoid biosynthesis	ko00943	2 out of 20 10%	4 out of 54 7.40740740740741%	0.474923399451702	1	2	4	20	54	Zmdp005767;MWSHY0137
Metabolic pathways	ko01100	4 out of 20 20%	10 out of 54 18.5185185185185%	0.550260195609544	1	9	19	20	54	MWSHY0136;MWSHY0080;MWSHY0104;MWSHY0051;mws0032;mws0913;MWSHY0102;Lmsn002815;mws0047
Anthocyanin biosynthesis	ko00942	1 out of 20 5%	13 out of 54 24.0740740740741%	0.999162602624101	1	1	13	20	54	pmb0550
