# Supplementary material for: Shikimate Kinase Plays Important Roles in Anthocyanin Synthesis in Petunia
Source: Int J Mol Sci. 2022 Dec 15;23(24):15964. doi: 10.3390/ijms232415964 (PMC9786173; doi:10.3390/ijms232415964)
Supplement: Supplementary file 1 [file ijms-23-15964-s001.zip › Supplemental Data File 4.xlsx]

## Sheet: Sheet1
Supporting Information Data File 4 The top ten downregulated/upregulated metabolites
Index	Formula	Compounds	Class I	Class II	CAS	Level	pTRV2-1	pTRV2-2	pTRV2-3	pTRV2-PhCS-1	pTRV2-PhCS-2	pTRV2-PhCS-3	VIP	Fold_Change	Log2FC	Type
mws0988	C16H12O7	Rhamnetin	Flavonoids	Flavonols	90-19-7	2	17624	17869	17042	9	9	9	1.14252	0.000513943	-10.9261	down
pmb3000	C24H24O12	Chrysoeriol-7-O-(6''-acetyl)glucoside	Flavonoids	Flavones	-	3	6944.8	10509	8352.2	9	9	9	1.14189	0.00104627	-9.90053	down
Lmbp003668	C20H18O10	Kaempferol-3-O-arabinoside	Flavonoids	Flavones	-	3	7572.3	7776.1	8787.5	9	9	9	1.14242	0.00111867	-9.80401	down
MWSHY0040	C21H20O10	Oroxin A	Flavonoids	Flavones	57396-78-8	3	3666.1	4352.6	4192.8	9	9	9	1.14238	0.00221103	-8.82107	down
Lmgp004474	C27H30O14	Genistein-7-O-galactoside-rhamnose	Flavonoids	Isoflavones	-	2	3304.8	1323	1984.2	9	9	9	1.13695	0.00408348	-7.93598	down
mws0042	C15H14O7	Epigallocatechin	Flavonoids	Flavanols	970-74-1	3	110110	113890	123330	12218	11148	10179	1.14077	0.0965796	-3.37214	down
pmp000013	C24H26O12	Eupatilin-7-O-glucoside	Flavonoids	Flavones	-	1	53264	59496	61140	6000.9	4146	7454.3	1.1291	0.101214	-3.30451	down
MWSHY0051	C15H10O6	Kaempferol (3,5,7,4'-Tetrahydroxyflavone)	Flavonoids	Flavonols	520-18-3	1	38633	45201	46491	4524.7	5375.1	6107.6	1.13726	0.122827	-3.0253	down
Lmdp004267	C30H26O14	Quercetin-3-O-(6''-p-Coumaroyl)glucoside	Flavonoids	Flavonols	-	2	259040	269140	265840	53793	55510	42783	1.13693	0.191539	-2.38429	down
Lmyp004052	C30H26O14	Quercetin-3-O-(6''-p-Coumaroyl)galactoside	Flavonoids	Flavonols	-	2	247500	225160	236040	50309	49427	36400	1.13276	0.192093	-2.38013	down
Hmcp002187	C23H24O13	Limocitrin-3-O-galactoside	Flavonoids	Flavonols	-	1	849160	960930	1038300	1941800	2079900	1716500	1.11268	2.01454	1.01045	up
Zmmp003556	C44H51O24+	Petunidin-3-O-(6''-O-feruloyl)rutinoside-5-O-glucoside	Flavonoids	Anthocyanidins	-	3	62072	45941	47534	114220	105480	94173	1.09147	2.01787	1.01283	up
Hmln001682	C29H32O18	Quercetin-3-O-(6''-acetyl)glucosyl-(1→3)-Galactoside	Flavonoids	Flavonols	-	3	1339.8	1366.7	1044.8	1937.5	2568.7	3355.6	1.02064	2.09575	1.06747	up
Hmcp002207	C22H22O12	Isorhamnetin-7-O-glucoside (Brassicin)	Flavonoids	Flavonols	6743-96-0	1	722570	826560	916330	1846200	1896000	1586400	1.11354	2.1613	1.1119	up
Lmjp002906	C22H22O12	Rhamnetin-3-O-Glucoside	Flavonoids	Flavonols	27875-34-9	1	759790	944500	768570	1857700	1768000	1736400	1.12255	2.16838	1.11662	up
Lmjp003295	C22H22O12	6-Methoxykaempferol-3-O-glucoside	Flavonoids	Flavonols	63422-27-5	1	848160	782830	873960	1900700	1881000	1913600	1.13897	2.27362	1.18499	up
Lmjp003044	C22H22O12	Isorhamnetin-3-O-Glucoside	Flavonoids	Flavonols	5041-82-7	1	1306100	1149200	1054700	2855400	2613000	2517500	1.1257	2.27519	1.18598	up
mws0789	C15H12O4	Pinocembrin (Dihydrochrysin)	Flavonoids	Flavanones	480-39-7	1	804.11	1574.1	957.96	2447.7	2953.8	2323.8	1.02532	2.31562	1.2114	up
Zmxp005470	C26H26O15	Tricin-7-O-(6''-O-malonyl)glucoside	Flavonoids	Flavones	-	1	349950	390900	377140	890120	843950	858880	1.13839	2.3193	1.21369	up
Li512111	C24H24O13	Isorhamnetin-3-O-(6''-acetylglucoside)	Flavonoids	Flavonols	-	2	44347	46455	45081	116720	100300	100470	1.13446	2.3365	1.22435	up
