# Supplementary material for: Shikimate Kinase Plays Important Roles in Anthocyanin Synthesis in Petunia
Source: Int J Mol Sci. 2022 Dec 15;23(24):15964. doi: 10.3390/ijms232415964 (PMC9786173; doi:10.3390/ijms232415964)
Supplement: Supplementary file 1 [file ijms-23-15964-s001.zip › Supplemental Data File 5.xlsx]

## Sheet: Sheet1
Supporting Information Data File 5 anthocyanidins metabolites in PhSK-silenced corollas and control in petunia
Compounds	Class I	Class II	Fold_Change	Log2FC	Type
Cyanidin-3-O-glucoside (Kuromanin)	Flavonoids	Anthocyanidins	0.478392	-1.06374	down
Cyanidin-3-O-(2''-O-glucosyl)rutinoside	Flavonoids	Anthocyanidins	0.460445	-1.1189	down
Cyanidin-3-O-sophoroside-5-O-glucoside	Flavonoids	Anthocyanidins	0.48068	-1.05685	down
Delphinidin-3-O-rutinoside-7-O-glucoside	Flavonoids	Anthocyanidins	0.494487	-1.016	down
Cyanidin-3-O-(6''-O-malonyl)sophoroside-5-O-glucoside	Flavonoids	Anthocyanidins	0.474736	-1.0748	down
Cyanidin-3,3'-di-O-glucoside-7-O-(6''-O-caffeoyl)glucoside	Flavonoids	Anthocyanidins	0.476739	-1.06873	down
Petunidin-3-O-(6''-O-feruloyl)rutinoside-5-O-glucoside	Flavonoids	Anthocyanidins	2.01787	1.01283	up
Pelargonidin-3-O-glucoside	Flavonoids	Anthocyanidins	1.30504	0.384099	insig
Delphinidin-3-O-glucoside (Mirtillin)	Flavonoids	Anthocyanidins	0.983983	-0.0232949	insig
Rosinidin-3-O-glucoside	Flavonoids	Anthocyanidins	1.66292	0.733717	insig
Petunidin-3-O-glucoside	Flavonoids	Anthocyanidins	0.824999	-0.277535	insig
Cyanidin-3-O-(6''-O-malonyl)glucoside	Flavonoids	Anthocyanidins	0.741718	-0.431058	insig
Cyanidin-3-O-sambubioside [Cyanidin-3-O-(2''-O-xylosyl)glucoside]	Flavonoids	Anthocyanidins	0.523825	-0.932844	insig
Cyanidin-3-O-(6''-O-p-Coumaroyl)glucoside	Flavonoids	Anthocyanidins	0.507935	-0.977283	insig
Cyanidin-3-O-(6''-O-caffeoyl)glucoside	Flavonoids	Anthocyanidins	0.526671	-0.925027	insig
Delphinidin-3-O-(6''-O-p-coumaroyl)glucoside	Flavonoids	Anthocyanidins	0.856879	-0.222836	insig
Cyanidin-3,5-O-diglucoside (Cyanin)	Flavonoids	Anthocyanidins	0.654093	-0.612432	insig
Petunidin-3-O-(6''-O-p-Coumaroyl)glucoside	Flavonoids	Anthocyanidins	0.545296	-0.874888	insig
Peonidin-3,5-O-diglucoside	Flavonoids	Anthocyanidins	1.11108	0.151962	insig
Delphinidin-3-O-(6''-O-caffeoyl)glucoside	Flavonoids	Anthocyanidins	0.555253	-0.848782	insig
Delphinidin-3,5-di-O-glucoside	Flavonoids	Anthocyanidins	0.83194	-0.265448	insig
Cyanidin-3-O-(6''-O-malonyl)glucoside-5-O-glucoside	Flavonoids	Anthocyanidins	0.573631	-0.801805	insig
Delphinidin-3-O-(6''-O-malonyl)glucoside-5-O-glucoside	Flavonoids	Anthocyanidins	1.1441	0.19421	insig
Cyanidin-3-O-(6''-O-p-coumaroyl)glucoside-5-O-glucoside	Flavonoids	Anthocyanidins	0.588206	-0.765606	insig
Delphinidin-3-O-(2'''-O-p-coumaroyl)rutinoside	Flavonoids	Anthocyanidins	0.627316	-0.672735	insig
Petunidin-3-O-(6''-O-p-coumaroyl)glucoside-5-O-rhamnoside	Flavonoids	Anthocyanidins	0.93438	-0.0979191	insig
Peonidin-3-O-rutinoside-5-O-glucoside	Flavonoids	Anthocyanidins	0.641837	-0.639721	insig
Malvidin-3-O-(2'''-O-p-coumaroyl)rutinoside	Flavonoids	Anthocyanidins	0.908876	-0.137845	insig
Peonidin-3-O-sophoroside-5-O-glucoside	Flavonoids	Anthocyanidins	0.780597	-0.357349	insig
Petunidin-3-O-rutinoside-5-O-glucoside	Flavonoids	Anthocyanidins	1.11909	0.162329	insig
Delphinidin-3-O-(6''-O-caffeoyl)glucoside-5-O-glucoside	Flavonoids	Anthocyanidins	0.680379	-0.55559	insig
Delphinidin-3,5,3'-Tri-O-glucoside	Flavonoids	Anthocyanidins	0.749994	-0.415049	insig
Delphinidin-3-O-sophoroside-5-O-glucoside	Flavonoids	Anthocyanidins	0.920502	-0.119508	insig
Malvidin-3-O-(6''-O-p-coumaroyl)glucoside-5-O-glucoside	Flavonoids	Anthocyanidins	0.749931	-0.41517	insig
Malvidin-3-O-rutinoside-7-O-glucoside	Flavonoids	Anthocyanidins	0.996361	-0.00526	insig
Delphinidin-3-O-(2'''-O-malonyl)sophoroside-5-O-glucoside	Flavonoids	Anthocyanidins	0.9256	-0.11154	insig
Cyanidin-3-O-(6''-O-p-coumaroyl)rutinoside-5-O-glucoside	Flavonoids	Anthocyanidins	0.830326	-0.268251	insig
Peonidin-3-O-(6''-O-p-coumaroyl)rutinoside-5-O-glucoside	Flavonoids	Anthocyanidins	0.608948	-0.715609	insig
Delphinidin-3-O-(2'''-O-p-coumaroyl)rutinoside-5-O-glucoside	Flavonoids	Anthocyanidins	0.953783	-0.0682675	insig
Petunidin-3-O-(6''-O-p-coumaroyl)rutinoside-5-O-glucoside	Flavonoids	Anthocyanidins	0.87245	-0.196855	insig
Cyanidin-3-O-(6''-O-caffeoyl)sophoroside-7-O-glucoside	Flavonoids	Anthocyanidins	0.517412	-0.950613	insig
Malvidin-3-O-(2'''-O-p-coumaroyl)rutinoside-5-O-glucoside	Flavonoids	Anthocyanidins	0.588766	-0.764235	insig
Petunidin-3-O-(6''-O-caffeoyl)rutinoside-5-O-glucoside	Flavonoids	Anthocyanidins	0.716395	-0.481172	insig
Petunidin-3-O-(6''-O-p-coumaroyl)rutinoside-5-O-glucoside-4'-O-glucoside	Flavonoids	Anthocyanidins	0.660036	-0.599383	insig
