# Supplementary material for: Shikimate Kinase Plays Important Roles in Anthocyanin Synthesis in Petunia
Source: Int J Mol Sci. 2022 Dec 15;23(24):15964. doi: 10.3390/ijms232415964 (PMC9786173; doi:10.3390/ijms232415964)
Supplement: Supplementary file 1 [file ijms-23-15964-s001.zip › Supplemental Data File 6.xlsx]

## Sheet: Sheet1
Supporting Information Data File 6 Differential Flavones metabolites in PhSK-silenced corollas and control in petunia
Compounds	Class I	Class II	Fold_Change	Log2FC	Type
6-Hydroxyluteolin	Flavonoids	Flavones	0.285785	-1.807	down
Tricetin (5,7,3',4',5'-Pentahydroxyflavone)	Flavonoids	Flavones	0.459923	-1.12054	down
5,7,2',5'-Tetrahydroxy-8,6'-dimethoxyflavone	Flavonoids	Flavones	0.340515	-1.55421	down
Centaureidin (5,7,3'-Trihydroxy-3,6,4'-Trimethoxyflavone)	Flavonoids	Flavones	0.47539	-1.07282	down
Acerosin	Flavonoids	Flavones	0.492248	-1.02254	down
Kaempferol-3-O-arabinoside	Flavonoids	Flavones	0.00111867	-9.80401	down
Oroxin A	Flavonoids	Flavones	0.00221103	-8.82107	down
Apigenin-3'-O-α-D-glucopyranoside	Flavonoids	Flavones	0.327885	-1.60874	down
Luteolin-7-O-glucoside (Cynaroside)	Flavonoids	Flavones	0.423406	-1.23989	down
Luteolin-4'-O-glucoside*	Flavonoids	Flavones	0.496342	-1.01059	down
Chrysoeriol-7-O-glucoside	Flavonoids	Flavones	0.458404	-1.12531	down
Chrysoeriol-7-O-(6''-acetyl)glucoside	Flavonoids	Flavones	0.00104627	-9.90053	down
Eupatilin-7-O-glucoside	Flavonoids	Flavones	0.101214	-3.30451	down
Luteolin-7-O-rutinoside	Flavonoids	Flavones	0.48135	-1.05484	down
Luteolin-7-O-neohesperidoside (Lonicerin)	Flavonoids	Flavones	0.482608	-1.05108	down
artemisidin A	Flavonoids	Flavones	0.331619	-1.5924	down
Isorhamnetin-3-O-rutinoside (Narcissin)	Flavonoids	Flavones	0.473987	-1.07708	down
Rhamnetin-3-O-Rutinoside	Flavonoids	Flavones	0.479563	-1.06021	down
Luteolin-7-O-(6''-malonyl)glucoside-5-O-arabinoside	Flavonoids	Flavones	0.48761	-1.0362	down
Luteolin-7-O-(6''-malonyl)glucoside-5-O-rhamnoside	Flavonoids	Flavones	0.408209	-1.29262	down
Luteolin-7-O-rutinoside-5-O-rhamnoside	Flavonoids	Flavones	0.239177	-2.06385	down
Chrysoeriol-5,7-di-O-rutinoside	Flavonoids	Flavones	0.489041	-1.03197	down
5,7,2'-Trhiyroxy-8-methoxyflavone	Flavonoids	Flavones	3.80509	1.92793	up
Tangeretin (4',5,6,7,8-Pentamethoxyflavone)	Flavonoids	Flavones	12.3366	3.62488	up
Nobiletin (5,6,7,8,3',4'-Hexamethoxyflavone)	Flavonoids	Flavones	5.60016	2.48547	up
Chrysin-7-O-(6''-malonyl)glucoside	Flavonoids	Flavones	5.10779	2.3527	up
Chrysoeriol-7-O-(6''-malonyl)glucoside	Flavonoids	Flavones	2.8858	1.52897	up
Tricin-7-O-(6''-O-malonyl)glucoside	Flavonoids	Flavones	2.3193	1.21369	up
Apigenin-7-O-rutinoside (Isorhoifolin)	Flavonoids	Flavones	33281.2	15.0224	up
Apigenin-7-O-neohesperidoside (Rhoifolin)	Flavonoids	Flavones	38001.2	15.2138	up
Apigenin-7-O-(6''-p-Coumaryl)glucoside	Flavonoids	Flavones	35393.4	15.1112	up
Kaempferol-3-O-(6''-p-Coumaroyl)galactoside	Flavonoids	Flavones	7160.17	12.8058	up
Luteolin-7-O-(6''-eudesmyl)glucoside	Flavonoids	Flavones	6.02679	2.59139	up
