# Supplementary material for: Shikimate Kinase Plays Important Roles in Anthocyanin Synthesis in Petunia
Source: Int J Mol Sci. 2022 Dec 15;23(24):15964. doi: 10.3390/ijms232415964 (PMC9786173; doi:10.3390/ijms232415964)
Supplement: Supplementary file 1 [file ijms-23-15964-s001.zip › Supplemental Data File 7.xlsx]

## Sheet: Sheet1
Supporting Information Data File 7 Differential Isoflavones metabolites in PhSK-silenced corollas and control in petunia
Compounds	Class I	Class II	Fold_Change	Log2FC	Type
Irigenin	Flavonoids	Isoflavones	0.460021	-1.12023	down
Formononetin-7-O-(6''-Malonyl)glucoside	Flavonoids	Isoflavones	0.497954	-1.00592	down
Genistein-7-O-galactoside-rhamnose	Flavonoids	Isoflavones	0.00408348	-7.93598	down
