# Supplementary material for: Shikimate Kinase Plays Important Roles in Anthocyanin Synthesis in Petunia
Source: Int J Mol Sci. 2022 Dec 15;23(24):15964. doi: 10.3390/ijms232415964 (PMC9786173; doi:10.3390/ijms232415964)
Supplement: Supplementary file 1 [file ijms-23-15964-s001.zip › Supplemental Data File 8.xlsx]

## Sheet: Sheet1
Supporting Information Data File 8 Differential Flavonols metabolites in PhSK-silenced corollas and control in petunia
Compounds	Class I	Class II	Fold_Change	Log2FC	Type
Kaempferol (3,5,7,4'-Tetrahydroxyflavone)	Flavonoids	Flavonols	0.122827	-3.0253	down
Quercetin	Flavonoids	Flavonols	0.304439	-1.71578	down
Myricetin	Flavonoids	Flavonols	0.212765	-2.23266	down
Rhamnetin	Flavonoids	Flavonols	0.000513943	-10.9261	down
Myricetin-3-O-arabinoside*	Flavonoids	Flavonols	0.233511	-2.09844	down
Kaempferol-3-O-glucuronide	Flavonoids	Flavonols	0.494502	-1.01595	down
Kaempferol-3-O-glucoside (Astragalin)	Flavonoids	Flavonols	0.360721	-1.47105	down
Kaempferol-3-O-galactoside (Trifolin)	Flavonoids	Flavonols	0.318265	-1.6517	down
Gossypetin-3-O-glucoside	Flavonoids	Flavonols	0.204227	-2.29176	down
Myricetin-3-O-galactoside	Flavonoids	Flavonols	0.240799	-2.0541	down
Quercetagetin-7-O-glucoside	Flavonoids	Flavonols	0.230954	-2.11432	down
Myricetin-3-O-glucoside	Flavonoids	Flavonols	0.204541	-2.28954	down
Kaempferol-3-O-sambubioside	Flavonoids	Flavonols	0.43123	-1.21347	down
Kaempferol-3-O-robinobioside(Biorobin)	Flavonoids	Flavonols	0.412333	-1.27812	down
Kaempferol-3-O-glucorhamnoside	Flavonoids	Flavonols	0.47355	-1.07841	down
Kaempferol-3-O-rutinoside(Nicotiflorin)	Flavonoids	Flavonols	0.417773	-1.25921	down
Kaempferol-3-O-neohesperidoside	Flavonoids	Flavonols	0.436995	-1.19431	down
Kaempferol-3,7-di-O-glucoside	Flavonoids	Flavonols	0.494835	-1.01498	down
Kaempferol-3-O-(6''-Acetyl)glucosyl-(1→3)-Galactoside	Flavonoids	Flavonols	0.353972	-1.49829	down
Quercetin-3-O-(6''-p-Coumaroyl)galactoside	Flavonoids	Flavonols	0.192093	-2.38013	down
Quercetin-3-O-(6''-p-Coumaroyl)glucoside	Flavonoids	Flavonols	0.191539	-2.38429	down
Kaempferol-3-O-sophoroside-7-O-rhamnoside	Flavonoids	Flavonols	0.376168	-1.41055	down
Kaempferol-3-O-rutinoside-7-O-glucoside	Flavonoids	Flavonols	0.460999	-1.11716	down
Kaempferol-3-O-sophoroside-7-O-glucoside	Flavonoids	Flavonols	0.479464	-1.06051	down
kaempferol-3-p-coumaroyldiglucoside	Flavonoids	Flavonols	0.328238	-1.60718	down
Kaempferol-3-O-(6'''-Caffeoyl)glucosyl-(1→2)-Galactoside	Flavonoids	Flavonols	0.378433	-1.40189	down
kaempferol-3-caffeoyldiglucoside	Flavonoids	Flavonols	0.383435	-1.38294	down
Quercetin-3-O-(2'''-Caffeoyl)sophoroside	Flavonoids	Flavonols	0.476581	-1.06921	down
Isorhamnetin-3-O-[2'''-O-(6''-p-coumaryl)glucosyl]rhamnoside	Flavonoids	Flavonols	0.222205	-2.17003	down
Kaempferol-3-O-(2''-caffeoyl)glucosyl-(1→2)-(6''-malonyl)glucoside	Flavonoids	Flavonols	0.406508	-1.29864	down
Kaempferol-3-O-sophorotrioside-7-O-glucoside	Flavonoids	Flavonols	0.444708	-1.16907	down
kaempferol-3-p-coumaroyldiglucoside-7-glucoside	Flavonoids	Flavonols	0.442358	-1.17671	down
kaempferol-3-caffcoyldiglucoside-7-glucoside	Flavonoids	Flavonols	0.466595	-1.09976	down
Quercetin-3-O-(2'''-p-coumaroyl)sophoroside-7-O-glucoside	Flavonoids	Flavonols	0.362612	-1.4635	down
6-Methoxykaempferol-3-O-glucoside	Flavonoids	Flavonols	2.27362	1.18499	up
Isorhamnetin-3-O-Glucoside	Flavonoids	Flavonols	2.27519	1.18598	up
Isorhamnetin-7-O-glucoside (Brassicin)	Flavonoids	Flavonols	2.1613	1.1119	up
Rhamnetin-3-O-Glucoside	Flavonoids	Flavonols	2.16838	1.11662	up
Limocitrin-3-O-galactoside	Flavonoids	Flavonols	2.01454	1.01045	up
Isorhamnetin-3-O-(6''-acetylglucoside)	Flavonoids	Flavonols	2.3365	1.22435	up
Quercetin-3-O-(6''-acetyl)glucosyl-(1→3)-Galactoside	Flavonoids	Flavonols	2.09575	1.06747	up
