# Supplementary material for: Shikimate Kinase Plays Important Roles in Anthocyanin Synthesis in Petunia
Source: Int J Mol Sci. 2022 Dec 15;23(24):15964. doi: 10.3390/ijms232415964 (PMC9786173; doi:10.3390/ijms232415964)
Supplement: Supplementary file 1 [file ijms-23-15964-s001.zip › Supplemental Data File 9.xlsx]

## Sheet: Sheet1
Supplemental Data 9 Differential Flavanonols metabolites in PhSK-silenced corollas and control in petunia
Compounds	Class I	Class II	Fold_Change	Log2FC	Type
Pinobanksin	Flavonoids	Flavanonols	0.268302	-1.89807	down
Aromadendrin-7-O-glucoside	Flavonoids	Flavanonols	0.348151	-1.52222	down
Dihydromyricetin-3-O-glucoside	Flavonoids	Flavanonols	5.23256	2.38752	up
