# Supplementary material for: Shikimate Kinase Plays Important Roles in Anthocyanin Synthesis in Petunia
Source: Int J Mol Sci. 2022 Dec 15;23(24):15964. doi: 10.3390/ijms232415964 (PMC9786173; doi:10.3390/ijms232415964)
Supplement: Supplementary file 1 [file ijms-23-15964-s001.zip › Supplemental Data File 10.xlsx]

## Sheet: Sheet1
Supporting Information Data File 9 Differential Flavanones metabolites in PhSK-silenced corollas and control in petunia
Compounds	Class I	Class II	Fold_Change	Log2FC	Type
Butin	Flavonoids	Flavanones	0.40983	-1.2869	down
Naringenin (5,7,4'-Trihydroxyflavanone)	Flavonoids	Flavanones	0.43527	-1.20002	down
Naringenin-7-O-glucoside (Prunin)	Flavonoids	Flavanones	0.391506	-1.3529	down
Hesperetin-7-O-glucoside	Flavonoids	Flavanones	0.443519	-1.17293	down
Eriodictyol-7-O-(6''-malonyl)glucoside	Flavonoids	Flavanones	0.496181	-1.01106	down
Eriodictyol-7-O-rutinoside-4'-O-Sophoroside	Flavonoids	Flavanones	0.364214	-1.45714	down
Pinocembrin (Dihydrochrysin)	Flavonoids	Flavanones	2.31562	1.2114	up
Diosmetin (5,7,3'-Trihydroxy-4'-methoxyflavone)	Flavonoids	Flavanones	3.69707	1.88638	up
